# Supplementary material
Source: PubMed Central journal article supplement (PMC3200252)

**Table 1** Age and Sex- Specific Reference percentiles for Total Body Bone Mineral Content for Black and Non-Black Children  
L, M, and S values to calculate Z-scores and Ht-Z prediction equations to calculate Height Adjusted Z-scores are also shown.

| Total Body BMC, g |                 |       |      |      |      |      |                 |                         |        |       |      |      |      |      |                 |                         |
|-------------------|-----------------|-------|------|------|------|------|-----------------|-------------------------|--------|-------|------|------|------|------|-----------------|-------------------------|
| Black Females     |                 |       |      |      |      |      |                 | Black Males             |        |       |      |      |      |      |                 |                         |
| Age,y             | L               | S     | M    |      |      |      | Ht-Z Prediction | Equation                | L      | S     | M    |      |      |      | Ht-Z Prediction | Equation                |
|                   | 3 <sup>rd</sup> | 10th  | 50th | 90th | 97th | 3rd  | 10th            |                         | 50th   | 90th  | 97th |      |      |      |                 |                         |
| 5                 | 0.237           | 0.116 | 561  | 604  | 702  | 813  | 869             | -0.688 + (Ht-Z * 0.823) | 0.911  | 0.125 | 536  | 588  | 699  | 811  | 865             | -0.544 + (Ht-Z * 0.515) |
| 6                 | 0.237           | 0.117 | 625  | 673  | 784  | 909  | 972             | -0.320 + (Ht-Z * 0.587) | 0.824  | 0.122 | 632  | 689  | 814  | 943  | 1004            | -0.533 + (Ht-Z * 0.668) |
| 7                 | 0.237           | 0.119 | 695  | 749  | 874  | 1015 | 1087            | 0.001 + (Ht-Z * 0.517)  | 0.743  | 0.119 | 724  | 787  | 925  | 1068 | 1137            | -0.472 + (Ht-Z * 0.607) |
| 8                 | 0.237           | 0.121 | 763  | 823  | 964  | 1122 | 1202            | -0.013 + (Ht-Z * 0.528) | 0.674  | 0.118 | 807  | 875  | 1026 | 1184 | 1260            | -0.312 + (Ht-Z * 0.649) |
| 9                 | 0.237           | 0.123 | 840  | 907  | 1065 | 1243 | 1334            | -0.111 + (Ht-Z * 0.489) | 0.611  | 0.118 | 888  | 962  | 1127 | 1302 | 1388            | -0.262 + (Ht-Z * 0.564) |
| 10                | 0.237           | 0.126 | 939  | 1017 | 1199 | 1404 | 1509            | -0.375 + (Ht-Z * 0.570) | 0.546  | 0.121 | 970  | 1052 | 1237 | 1435 | 1533            | -0.250 + (Ht-Z * 0.603) |
| 11                | 0.237           | 0.129 | 1074 | 1166 | 1380 | 1622 | 1747            | -0.456 + (Ht-Z * 0.725) | 0.474  | 0.128 | 1053 | 1146 | 1358 | 1590 | 1705            | -0.355 + (Ht-Z * 0.656) |
| 12                | 0.237           | 0.131 | 1235 | 1342 | 1592 | 1876 | 2022            | -0.402 + (Ht-Z * 0.795) | 0.378  | 0.140 | 1153 | 1264 | 1523 | 1812 | 1958            | -0.386 + (Ht-Z * 0.646) |
| 13                | 0.237           | 0.130 | 1395 | 1515 | 1796 | 2116 | 2280            | -0.185 + (Ht-Z * 0.778) | 0.267  | 0.157 | 1284 | 1421 | 1747 | 2124 | 2321            | -0.453 + (Ht-Z * 0.775) |
| 14                | 0.237           | 0.129 | 1531 | 1662 | 1967 | 2313 | 2491            | -0.028 + (Ht-Z * 0.727) | 0.178  | 0.165 | 1469 | 1630 | 2023 | 2491 | 2739            | -0.294 + (Ht-Z * 0.729) |
| 15                | 0.237           | 0.128 | 1634 | 1772 | 2094 | 2460 | 2648            | 0.010 + (Ht-Z * 0.687)  | 0.128  | 0.160 | 1688 | 1864 | 2295 | 2811 | 3085            | -0.168 + (Ht-Z * 0.725) |
| 16                | 0.237           | 0.128 | 1705 | 1848 | 2183 | 2563 | 2758            | -0.015 + (Ht-Z * 0.754) | 0.086  | 0.148 | 1911 | 2093 | 2535 | 3061 | 3340            | -0.072 + (Ht-Z * 0.688) |
| 17                | 0.237           | 0.127 | 1753 | 1900 | 2244 | 2634 | 2833            | -0.096 + (Ht-Z * 0.826) | 0.040  | 0.138 | 2098 | 2281 | 2724 | 3248 | 3526            | -0.048 + (Ht-Z * 0.712) |
| 18                | 0.237           | 0.127 | 1788 | 1938 | 2288 | 2685 | 2888            | -0.153 + (Ht-Z * 0.782) | 0.002  | 0.131 | 2228 | 2411 | 2850 | 3370 | 3645            | -0.016 + (Ht-Z * 0.792) |
| 19                | 0.237           | 0.127 | 1817 | 1969 | 2324 | 2727 | 2933            | -0.177 + (Ht-Z * 0.807) | -0.019 | 0.127 | 2295 | 2476 | 2913 | 3427 | 3700            | -0.003 + (Ht-Z * 0.862) |

|                          |          |          |                       |             |             |             |                        |                         |                        |          |                       |             |             |             |                        |                         |
|--------------------------|----------|----------|-----------------------|-------------|-------------|-------------|------------------------|-------------------------|------------------------|----------|-----------------------|-------------|-------------|-------------|------------------------|-------------------------|
| <b>20</b>                | 0.237    | 0.127    | 1844                  | 1998        | 2359        | 2767        | 2977                   | -0.200 + (Ht-Z * 0.884) | -0.030                 | 0.125    | 2328                  | 2509        | 2943        | 3455        | 3726                   | 0.149 + (Ht-Z * 0.912)  |
| <b>Non-Black Females</b> |          |          |                       |             |             |             |                        |                         | <b>Non-Black Males</b> |          |                       |             |             |             |                        |                         |
|                          | <b>L</b> | <b>S</b> | <b>M</b>              |             |             |             | <b>Ht-Z Prediction</b> |                         | <b>L</b>               | <b>S</b> | <b>M</b>              |             |             |             | <b>Ht-Z Prediction</b> |                         |
| <b>Age,y</b>             |          |          | <b>3<sup>rd</sup></b> | <b>10th</b> | <b>50th</b> | <b>90th</b> | <b>97th</b>            | <b>Equation</b>         |                        |          | <b>3<sup>rd</sup></b> | <b>10th</b> | <b>50th</b> | <b>90th</b> | <b>97th</b>            | <b>Equation</b>         |
| <b>5</b>                 | 0.167    | 0.133    | 477                   | 518         | 616         | 728         | 787                    | -0.400 + (Ht-Z * 0.821) | -0.256                 | 0.109    | 501                   | 534         | 612         | 705         | 755                    | -0.058 + (Ht-Z * 0.873) |
| <b>6</b>                 | 0.167    | 0.133    | 555                   | 603         | 717         | 848         | 916                    | -0.081 + (Ht-Z * 0.652) | -0.256                 | 0.110    | 601                   | 640         | 734         | 847         | 908                    | 0.008 + (Ht-Z * 0.580)  |
| <b>7</b>                 | 0.167    | 0.133    | 628                   | 682         | 811         | 959         | 1036                   | 0.063 + (Ht-Z * 0.645)  | -0.256                 | 0.111    | 685                   | 730         | 840         | 971         | 1041                   | -0.058 + (Ht-Z * 0.697) |
| <b>8</b>                 | 0.167    | 0.133    | 691                   | 751         | 892         | 1056        | 1140                   | 0.101 + (Ht-Z * 0.622)  | -0.256                 | 0.113    | 757                   | 808         | 932         | 1079        | 1159                   | -0.064 + (Ht-Z * 0.735) |
| <b>9</b>                 | 0.167    | 0.133    | 754                   | 820         | 974         | 1152        | 1245                   | 0.079 + (Ht-Z * 0.634)  | -0.256                 | 0.116    | 825                   | 882         | 1020        | 1186        | 1276                   | -0.008 + (Ht-Z * 0.693) |
| <b>10</b>                | 0.167    | 0.133    | 832                   | 904         | 1075        | 1271        | 1373                   | -0.052 + (Ht-Z * 0.712) | -0.256                 | 0.119    | 891                   | 954         | 1107        | 1293        | 1394                   | -0.044 + (Ht-Z * 0.748) |
| <b>11</b>                | 0.167    | 0.133    | 941                   | 1022        | 1215        | 1437        | 1552                   | -0.156 + (Ht-Z * 0.816) | -0.256                 | 0.123    | 964                   | 1034        | 1207        | 1418        | 1533                   | -0.043 + (Ht-Z * 0.783) |
| <b>12</b>                | 0.167    | 0.133    | 1090                  | 1184        | 1407        | 1664        | 1798                   | -0.154 + (Ht-Z * 0.931) | -0.256                 | 0.131    | 1062                  | 1144        | 1347        | 1598        | 1736                   | -0.134 + (Ht-Z * 0.823) |
| <b>13</b>                | 0.167    | 0.133    | 1257                  | 1366        | 1623        | 1920        | 2075                   | -0.096 + (Ht-Z * 0.935) | -0.256                 | 0.140    | 1195                  | 1294        | 1542        | 1852        | 2025                   | -0.187 + (Ht-Z * 0.886) |
| <b>14</b>                | 0.167    | 0.133    | 1397                  | 1517        | 1803        | 2133        | 2304                   | -0.086 + (Ht-Z * 0.832) | -0.256                 | 0.147    | 1378                  | 1498        | 1800        | 2181        | 2396                   | -0.154 + (Ht-Z * 0.911) |
| <b>15</b>                | 0.167    | 0.133    | 1493                  | 1622        | 1928        | 2281        | 2464                   | -0.102 + (Ht-Z * 0.802) | -0.256                 | 0.145    | 1601                  | 1739        | 2085        | 2523        | 2768                   | -0.135 + (Ht-Z * 0.837) |
| <b>16</b>                | 0.167    | 0.133    | 1557                  | 1691        | 2010        | 2378        | 2568                   | -0.130 + (Ht-Z * 0.813) | -0.256                 | 0.140    | 1802                  | 1951        | 2324        | 2791        | 3051                   | -0.101 + (Ht-Z * 0.755) |
| <b>17</b>                | 0.167    | 0.133    | 1596                  | 1734        | 2061        | 2438        | 2633                   | -0.162 + (Ht-Z * 0.785) | -0.256                 | 0.136    | 1942                  | 2098        | 2487        | 2971        | 3239                   | -0.071 + (Ht-Z * 0.747) |
| <b>18</b>                | 0.167    | 0.133    | 1619                  | 1759        | 2091        | 2473        | 2672                   | -0.148 + (Ht-Z * 0.786) | -0.256                 | 0.134    | 2027                  | 2187        | 2586        | 3081        | 3354                   | -0.077 + (Ht-Z * 0.782) |
| <b>19</b>                | 0.167    | 0.133    | 1632                  | 1773        | 2108        | 2493        | 2693                   | -0.139 + (Ht-Z * 0.789) | -0.256                 | 0.133    | 2078                  | 2241        | 2647        | 3148        | 3425                   | -0.087 + (Ht-Z * 0.822) |
| <b>20</b>                | 0.167    | 0.133    | 1641                  | 1783        | 2119        | 2506        | 2707                   | -0.118 + (Ht-Z * 0.738) | -0.256                 | 0.132    | 2118                  | 2283        | 2694        | 3201        | 3480                   | -0.080 + (Ht-Z * 0.816) |

**Table 2** Age and Sex- Specific Reference percentiles for Total Body areal Bone Mineral Density for Black and Non-Black Children  
L, M, and S values to calculate Z-scores and Ht-Z prediction equations to calculate Height Adjusted Z-scores are also shown.

| Total Body aBMD, g/cm <sup>2</sup> |        |       |       |       |       |       |       |                          |       |       |       |       |       |       |       |                         |
|------------------------------------|--------|-------|-------|-------|-------|-------|-------|--------------------------|-------|-------|-------|-------|-------|-------|-------|-------------------------|
| Black Females                      |        |       |       |       |       |       |       | Black Males              |       |       |       |       |       |       |       |                         |
| Age,y                              | L      | S     | M     |       |       |       |       | Ht-Z Prediction          | L     | S     | M     |       |       |       |       | Ht-Z Prediction         |
|                                    |        |       | 3rd   | 10th  | 50th  | 90th  | 97th  | Equation                 |       |       | 3rd   | 10th  | 50th  | 90th  | 97th  | Equation <sup>1</sup>   |
| 5                                  | 1.501  | 0.065 | 0.613 | 0.642 | 0.701 | 0.758 | 0.784 | -0.108 + (Ht-Z * -0.171) | 0.682 | 0.069 | 0.621 | 0.649 | 0.711 | 0.774 | 0.805 | -0.263 + (Ht-Z * 0.040) |
| 6                                  | 1.354  | 0.066 | 0.634 | 0.664 | 0.726 | 0.786 | 0.813 | -0.185 + (Ht-Z * 0.420)  | 0.682 | 0.070 | 0.651 | 0.682 | 0.747 | 0.815 | 0.848 | -0.222 + (Ht-Z * 0.097) |
| 7                                  | 1.185  | 0.067 | 0.658 | 0.689 | 0.754 | 0.818 | 0.847 | -0.189 + (Ht-Z * 0.436)  | 0.682 | 0.071 | 0.680 | 0.712 | 0.782 | 0.854 | 0.888 | -0.351 + (Ht-Z * 0.348) |
| 8                                  | 1.001  | 0.068 | 0.685 | 0.717 | 0.785 | 0.853 | 0.885 | -0.014 + (Ht-Z * 0.391)  | 0.682 | 0.072 | 0.710 | 0.744 | 0.819 | 0.896 | 0.932 | -0.231 + (Ht-Z * 0.357) |
| 9                                  | 0.794  | 0.069 | 0.716 | 0.749 | 0.820 | 0.893 | 0.928 | -0.008 + (Ht-Z * 0.412)  | 0.682 | 0.073 | 0.740 | 0.776 | 0.855 | 0.937 | 0.976 | -0.166 + (Ht-Z * 0.249) |
| 10                                 | 0.557  | 0.070 | 0.752 | 0.787 | 0.863 | 0.942 | 0.980 | -0.133 + (Ht-Z * 0.291)  | 0.682 | 0.075 | 0.768 | 0.807 | 0.890 | 0.976 | 1.018 | -0.167 + (Ht-Z * 0.234) |
| 11                                 | 0.288  | 0.072 | 0.795 | 0.832 | 0.913 | 1.000 | 1.043 | -0.230 + (Ht-Z * 0.381)  | 0.682 | 0.076 | 0.793 | 0.833 | 0.921 | 1.011 | 1.055 | -0.184 + (Ht-Z * 0.188) |
| 12                                 | 0.005  | 0.074 | 0.843 | 0.881 | 0.968 | 1.063 | 1.111 | -0.153 + (Ht-Z * 0.377)  | 0.682 | 0.077 | 0.819 | 0.861 | 0.953 | 1.048 | 1.093 | -0.117 + (Ht-Z * 0.100) |
| 13                                 | -0.269 | 0.075 | 0.888 | 0.928 | 1.020 | 1.124 | 1.178 | -0.097 + (Ht-Z * 0.406)  | 0.682 | 0.078 | 0.851 | 0.896 | 0.993 | 1.094 | 1.143 | -0.148 + (Ht-Z * 0.256) |
| 14                                 | -0.516 | 0.077 | 0.928 | 0.969 | 1.066 | 1.179 | 1.239 | 0.004 + (Ht-Z * 0.373)   | 0.682 | 0.080 | 0.894 | 0.942 | 1.048 | 1.157 | 1.209 | -0.113 + (Ht-Z * 0.314) |
| 15                                 | -0.717 | 0.078 | 0.959 | 1.001 | 1.103 | 1.223 | 1.287 | 0.058 + (Ht-Z * 0.350)   | 0.682 | 0.082 | 0.944 | 0.996 | 1.110 | 1.228 | 1.285 | -0.066 + (Ht-Z * 0.361) |
| 16                                 | -0.867 | 0.079 | 0.981 | 1.024 | 1.128 | 1.253 | 1.321 | 0.032 + (Ht-Z * 0.403)   | 0.682 | 0.084 | 0.989 | 1.045 | 1.169 | 1.296 | 1.357 | 0.018 + (Ht-Z * 0.286)  |
| 17                                 | -0.969 | 0.079 | 0.996 | 1.039 | 1.144 | 1.273 | 1.344 | -0.031 + (Ht-Z * 0.525)  | 0.682 | 0.085 | 1.027 | 1.087 | 1.217 | 1.353 | 1.418 | 0.004 + (Ht-Z * 0.337)  |
| 18                                 | -1.041 | 0.080 | 1.006 | 1.049 | 1.156 | 1.288 | 1.361 | -0.090 + (Ht-Z * 0.471)  | 0.682 | 0.086 | 1.051 | 1.113 | 1.249 | 1.390 | 1.457 | 0.043 + (Ht-Z * 0.416)  |
| 19                                 | -1.103 | 0.080 | 1.014 | 1.058 | 1.166 | 1.300 | 1.374 | -0.161 + (Ht-Z * 0.493)  | 0.682 | 0.087 | 1.063 | 1.126 | 1.265 | 1.408 | 1.477 | 0.078 + (Ht-Z * 0.440)  |
| 20                                 | -1.165 | 0.080 | 1.023 | 1.067 | 1.176 | 1.312 | 1.389 | -0.170 + (Ht-Z * 0.573)  | 0.682 | 0.087 | 1.069 | 1.133 | 1.272 | 1.417 | 1.487 | 0.233 + (Ht-Z * 0.504)  |
| Non-Black Females                  |        |       |       |       |       |       |       | Non-Black Males          |       |       |       |       |       |       |       |                         |
| Age,y                              | L      | S     | M     |       |       |       |       | Ht-Z Prediction          | L     | S     | M     |       |       |       |       | Ht-Z Prediction         |
|                                    |        |       | 3rd   | 10th  | 50th  | 90th  | 97th  | Equation                 |       |       | 3rd   | 10th  | 50th  | 90th  | 97th  | Equation                |

|    |        |       |       |       |       |       |       |                         |        |       |       |       |       |       |       |                         |
|----|--------|-------|-------|-------|-------|-------|-------|-------------------------|--------|-------|-------|-------|-------|-------|-------|-------------------------|
| 5  | -0.189 | 0.076 | 0.572 | 0.598 | 0.659 | 0.727 | 0.762 | 0.231 + (Ht-Z * 0.213)  | -0.587 | 0.078 | 0.583 | 0.609 | 0.671 | 0.743 | 0.782 | 0.207 + (Ht-Z * 0.100)  |
| 6  | -0.189 | 0.076 | 0.589 | 0.616 | 0.679 | 0.749 | 0.785 | -0.073 + (Ht-Z * 0.456) | -0.587 | 0.075 | 0.608 | 0.635 | 0.697 | 0.769 | 0.807 | -0.046 + (Ht-Z * 0.540) |
| 7  | -0.189 | 0.076 | 0.610 | 0.638 | 0.703 | 0.776 | 0.813 | 0.004 + (Ht-Z * 0.528)  | -0.587 | 0.072 | 0.637 | 0.663 | 0.726 | 0.798 | 0.836 | -0.061 + (Ht-Z * 0.407) |
| 8  | -0.189 | 0.076 | 0.636 | 0.665 | 0.732 | 0.808 | 0.847 | 0.147 + (Ht-Z * 0.538)  | -0.587 | 0.070 | 0.670 | 0.697 | 0.761 | 0.834 | 0.872 | -0.007 + (Ht-Z * 0.470) |
| 9  | -0.189 | 0.076 | 0.665 | 0.695 | 0.766 | 0.845 | 0.886 | 0.161 + (Ht-Z * 0.527)  | -0.587 | 0.068 | 0.704 | 0.731 | 0.796 | 0.871 | 0.910 | 0.058 + (Ht-Z * 0.498)  |
| 10 | -0.189 | 0.076 | 0.697 | 0.729 | 0.803 | 0.886 | 0.928 | 0.070 + (Ht-Z * 0.455)  | -0.587 | 0.067 | 0.733 | 0.761 | 0.827 | 0.904 | 0.943 | 0.024 + (Ht-Z * 0.502)  |
| 11 | -0.189 | 0.076 | 0.734 | 0.767 | 0.845 | 0.933 | 0.978 | 0.005 + (Ht-Z * 0.482)  | -0.587 | 0.067 | 0.758 | 0.787 | 0.855 | 0.934 | 0.975 | 0.039 + (Ht-Z * 0.413)  |
| 12 | -0.189 | 0.076 | 0.779 | 0.814 | 0.897 | 0.990 | 1.038 | -0.007 + (Ht-Z * 0.547) | -0.587 | 0.068 | 0.784 | 0.815 | 0.886 | 0.969 | 1.012 | -0.030 + (Ht-Z * 0.411) |
| 13 | -0.189 | 0.076 | 0.830 | 0.868 | 0.956 | 1.055 | 1.106 | 0.003 + (Ht-Z * 0.521)  | -0.587 | 0.070 | 0.816 | 0.849 | 0.926 | 1.015 | 1.062 | -0.075 + (Ht-Z * 0.437) |
| 14 | -0.189 | 0.076 | 0.874 | 0.915 | 1.008 | 1.112 | 1.165 | -0.037 + (Ht-Z * 0.472) | -0.587 | 0.074 | 0.856 | 0.892 | 0.978 | 1.077 | 1.130 | -0.055 + (Ht-Z * 0.506) |
| 15 | -0.189 | 0.076 | 0.906 | 0.948 | 1.044 | 1.153 | 1.208 | -0.070 + (Ht-Z * 0.460) | -0.587 | 0.078 | 0.903 | 0.943 | 1.038 | 1.150 | 1.210 | -0.079 + (Ht-Z * 0.461) |
| 16 | -0.189 | 0.076 | 0.928 | 0.971 | 1.069 | 1.180 | 1.237 | -0.114 + (Ht-Z * 0.447) | -0.587 | 0.080 | 0.949 | 0.993 | 1.096 | 1.218 | 1.283 | -0.055 + (Ht-Z * 0.389) |
| 17 | -0.189 | 0.076 | 0.942 | 0.985 | 1.086 | 1.198 | 1.256 | -0.171 + (Ht-Z * 0.441) | -0.587 | 0.081 | 0.985 | 1.031 | 1.139 | 1.267 | 1.335 | -0.039 + (Ht-Z * 0.371) |
| 18 | -0.189 | 0.076 | 0.951 | 0.995 | 1.096 | 1.210 | 1.268 | -0.168 + (Ht-Z * 0.427) | -0.587 | 0.081 | 1.007 | 1.054 | 1.166 | 1.298 | 1.368 | -0.075 + (Ht-Z * 0.427) |
| 19 | -0.189 | 0.076 | 0.957 | 1.001 | 1.102 | 1.217 | 1.275 | -0.211 + (Ht-Z * 0.418) | -0.587 | 0.081 | 1.021 | 1.068 | 1.182 | 1.316 | 1.388 | -0.092 + (Ht-Z * 0.468) |
| 20 | -0.189 | 0.076 | 0.961 | 1.005 | 1.107 | 1.222 | 1.280 | -0.203 + (Ht-Z * 0.357) | -0.587 | 0.082 | 1.030 | 1.079 | 1.194 | 1.330 | 1.402 | -0.113 + (Ht-Z * 0.472) |

**Table 3** Age and Sex- Specific Reference percentiles for Total Body Less Head areal Bone Mineral Density for Black and Non-Black Children  
L, M, and S values to calculate Z-scores and Ht-Z prediction equations to calculate Height Adjusted Z-scores are also shown. This measure excludes the aBMD of the head from the total body measurement.

| Total Body Less Head aBMD, g/cm <sup>2</sup> |        |       |       |       |       |                 |             |                         |       |       |       |       |                 |          |       |                         |
|----------------------------------------------|--------|-------|-------|-------|-------|-----------------|-------------|-------------------------|-------|-------|-------|-------|-----------------|----------|-------|-------------------------|
| Black Females                                |        |       |       |       |       |                 | Black Males |                         |       |       |       |       |                 |          |       |                         |
| Age,y                                        | L      | S     | M     |       |       | Ht-Z Prediction | Equation    | L                       | S     | M     |       |       | Ht-Z Prediction | Equation |       |                         |
|                                              | 3rd    | 10th  | 50th  | 90th  | 97th  | 3rd             |             | 10th                    | 50th  | 90th  | 97th  |       |                 |          |       |                         |
| 5                                            | 0.985  | 0.079 | 0.473 | 0.499 | 0.556 | 0.612           | 0.639       | 0.258 + (Ht-Z * 0.143)  | 0.317 | 0.082 | 0.477 | 0.502 | 0.559           | 0.620    | 0.650 | -0.036 + (Ht-Z * 0.396) |
| 6                                            | 1.101  | 0.079 | 0.502 | 0.531 | 0.591 | 0.651           | 0.679       | 0.093 + (Ht-Z * 0.554)  | 0.317 | 0.083 | 0.512 | 0.539 | 0.601           | 0.668    | 0.701 | -0.052 + (Ht-Z * 0.472) |
| 7                                            | 1.231  | 0.079 | 0.536 | 0.566 | 0.631 | 0.694           | 0.723       | 0.110 + (Ht-Z * 0.568)  | 0.317 | 0.083 | 0.550 | 0.579 | 0.646           | 0.717    | 0.753 | -0.197 + (Ht-Z * 0.607) |
| 8                                            | 1.357  | 0.079 | 0.570 | 0.603 | 0.672 | 0.739           | 0.769       | 0.140 + (Ht-Z * 0.564)  | 0.317 | 0.082 | 0.591 | 0.623 | 0.693           | 0.768    | 0.805 | -0.116 + (Ht-Z * 0.585) |
| 9                                            | 1.454  | 0.078 | 0.606 | 0.642 | 0.716 | 0.786           | 0.818       | 0.053 + (Ht-Z * 0.558)  | 0.317 | 0.080 | 0.630 | 0.662 | 0.734           | 0.812    | 0.850 | -0.130 + (Ht-Z * 0.522) |
| 10                                           | 1.448  | 0.078 | 0.649 | 0.687 | 0.765 | 0.840           | 0.874       | -0.148 + (Ht-Z * 0.501) | 0.317 | 0.078 | 0.667 | 0.700 | 0.775           | 0.856    | 0.896 | -0.226 + (Ht-Z * 0.614) |
| 11                                           | 1.213  | 0.077 | 0.699 | 0.738 | 0.821 | 0.901           | 0.938       | -0.318 + (Ht-Z * 0.639) | 0.317 | 0.079 | 0.700 | 0.736 | 0.815           | 0.900    | 0.942 | -0.278 + (Ht-Z * 0.524) |
| 12                                           | 0.714  | 0.077 | 0.752 | 0.791 | 0.877 | 0.964           | 1.006       | -0.196 + (Ht-Z * 0.650) | 0.317 | 0.082 | 0.732 | 0.771 | 0.858           | 0.952    | 0.998 | -0.277 + (Ht-Z * 0.415) |
| 13                                           | 0.053  | 0.077 | 0.799 | 0.837 | 0.924 | 1.019           | 1.067       | -0.139 + (Ht-Z * 0.638) | 0.317 | 0.088 | 0.769 | 0.813 | 0.912           | 1.020    | 1.073 | -0.373 + (Ht-Z * 0.569) |
| 14                                           | -0.630 | 0.078 | 0.835 | 0.872 | 0.960 | 1.064           | 1.120       | -0.051 + (Ht-Z * 0.573) | 0.317 | 0.094 | 0.813 | 0.862 | 0.975           | 1.097    | 1.158 | -0.258 + (Ht-Z * 0.473) |
| 15                                           | -1.181 | 0.079 | 0.860 | 0.896 | 0.985 | 1.097           | 1.159       | -0.028 + (Ht-Z * 0.557) | 0.317 | 0.096 | 0.860 | 0.913 | 1.035           | 1.167    | 1.232 | -0.207 + (Ht-Z * 0.492) |
| 16                                           | -1.536 | 0.079 | 0.875 | 0.910 | 1.000 | 1.117           | 1.185       | -0.070 + (Ht-Z * 0.590) | 0.317 | 0.093 | 0.908 | 0.962 | 1.086           | 1.221    | 1.288 | -0.150 + (Ht-Z * 0.437) |
| 17                                           | -1.730 | 0.080 | 0.883 | 0.918 | 1.008 | 1.128           | 1.199       | -0.168 + (Ht-Z * 0.740) | 0.317 | 0.089 | 0.949 | 1.003 | 1.127           | 1.261    | 1.327 | -0.169 + (Ht-Z * 0.481) |
| 18                                           | -1.832 | 0.080 | 0.887 | 0.922 | 1.013 | 1.134           | 1.207       | -0.242 + (Ht-Z * 0.583) | 0.317 | 0.087 | 0.974 | 1.029 | 1.152           | 1.284    | 1.350 | -0.104 + (Ht-Z * 0.536) |

|                          |          |          |            |             |             |             |                        |                         |                        |          |            |             |             |             |                        |                         |
|--------------------------|----------|----------|------------|-------------|-------------|-------------|------------------------|-------------------------|------------------------|----------|------------|-------------|-------------|-------------|------------------------|-------------------------|
| <b>19</b>                | -1.908   | 0.080    | 0.890      | 0.925       | 1.016       | 1.138       | 1.213                  | -0.279 + (Ht-Z * 0.617) | 0.317                  | 0.086    | 0.984      | 1.039       | 1.161       | 1.293       | 1.358                  | -0.140 + (Ht-Z * 0.651) |
| <b>20</b>                | -1.989   | 0.080    | 0.893      | 0.928       | 1.019       | 1.143       | 1.219                  | -0.338 + (Ht-Z * 0.712) | 0.317                  | 0.085    | 0.986      | 1.041       | 1.163       | 1.295       | 1.360                  | 0.044 + (Ht-Z * 0.607)  |
| <b>Non-Black Females</b> |          |          |            |             |             |             |                        |                         | <b>Non-Black Males</b> |          |            |             |             |             |                        |                         |
|                          | <b>L</b> | <b>S</b> | <b>M</b>   |             |             |             | <b>Ht-Z Prediction</b> |                         | <b>L</b>               | <b>S</b> | <b>M</b>   |             |             |             | <b>Ht-Z Prediction</b> |                         |
| <b>Age,y</b>             |          |          | <b>3rd</b> | <b>10th</b> | <b>50th</b> | <b>90th</b> | <b>97th</b>            | <b>Equation</b>         |                        |          | <b>3rd</b> | <b>10th</b> | <b>50th</b> | <b>90th</b> | <b>97th</b>            | <b>Equation</b>         |
| <b>5</b>                 | -0.018   | 0.088    | 0.438      | 0.462       | 0.517       | 0.578       | 0.610                  | 0.322 + (Ht-Z * 0.556)  | -0.402                 | 0.084    | 0.447      | 0.469       | 0.521       | 0.582       | 0.614                  | 0.330 + (Ht-Z * 0.467)  |
| <b>6</b>                 | -0.018   | 0.088    | 0.464      | 0.490       | 0.548       | 0.613       | 0.647                  | 0.083 + (Ht-Z * 0.675)  | -0.402                 | 0.084    | 0.474      | 0.497       | 0.552       | 0.617       | 0.651                  | 0.149 + (Ht-Z * 0.757)  |
| <b>7</b>                 | -0.018   | 0.088    | 0.493      | 0.519       | 0.581       | 0.650       | 0.686                  | 0.167 + (Ht-Z * 0.745)  | -0.402                 | 0.084    | 0.504      | 0.529       | 0.588       | 0.657       | 0.693                  | 0.108 + (Ht-Z * 0.698)  |
| <b>8</b>                 | -0.018   | 0.088    | 0.523      | 0.552       | 0.617       | 0.691       | 0.728                  | 0.244 + (Ht-Z * 0.780)  | -0.402                 | 0.084    | 0.542      | 0.569       | 0.632       | 0.706       | 0.745                  | 0.088 + (Ht-Z * 0.734)  |
| <b>9</b>                 | -0.018   | 0.088    | 0.557      | 0.587       | 0.656       | 0.735       | 0.774                  | 0.186 + (Ht-Z * 0.700)  | -0.402                 | 0.084    | 0.578      | 0.607       | 0.675       | 0.754       | 0.795                  | 0.099 + (Ht-Z * 0.736)  |
| <b>10</b>                | -0.018   | 0.088    | 0.594      | 0.626       | 0.701       | 0.784       | 0.827                  | 0.038 + (Ht-Z * 0.640)  | -0.402                 | 0.084    | 0.609      | 0.639       | 0.711       | 0.794       | 0.837                  | 0.035 + (Ht-Z * 0.732)  |
| <b>11</b>                | -0.018   | 0.088    | 0.638      | 0.672       | 0.752       | 0.842       | 0.888                  | -0.067 + (Ht-Z * 0.655) | -0.402                 | 0.084    | 0.639      | 0.670       | 0.745       | 0.832       | 0.878                  | 0.018 + (Ht-Z * 0.668)  |
| <b>12</b>                | -0.018   | 0.087    | 0.687      | 0.724       | 0.810       | 0.905       | 0.954                  | -0.053 + (Ht-Z * 0.672) | -0.402                 | 0.084    | 0.673      | 0.707       | 0.785       | 0.877       | 0.925                  | -0.067 + (Ht-Z * 0.668) |
| <b>13</b>                | -0.018   | 0.085    | 0.736      | 0.775       | 0.864       | 0.964       | 1.015                  | -0.018 + (Ht-Z * 0.611) | -0.402                 | 0.084    | 0.717      | 0.752       | 0.836       | 0.934       | 0.985                  | -0.122 + (Ht-Z * 0.663) |
| <b>14</b>                | -0.018   | 0.083    | 0.776      | 0.815       | 0.906       | 1.007       | 1.059                  | -0.062 + (Ht-Z * 0.559) | -0.402                 | 0.084    | 0.769      | 0.807       | 0.897       | 1.002       | 1.057                  | -0.121 + (Ht-Z * 0.680) |
| <b>15</b>                | -0.018   | 0.080    | 0.803      | 0.843       | 0.934       | 1.035       | 1.087                  | -0.110 + (Ht-Z * 0.539) | -0.402                 | 0.084    | 0.825      | 0.866       | 0.962       | 1.075       | 1.134                  | -0.140 + (Ht-Z * 0.592) |
| <b>16</b>                | -0.018   | 0.079    | 0.821      | 0.861       | 0.952       | 1.052       | 1.103                  | -0.172 + (Ht-Z * 0.532) | -0.402                 | 0.084    | 0.871      | 0.914       | 1.016       | 1.135       | 1.198                  | -0.143 + (Ht-Z * 0.515) |
| <b>17</b>                | -0.018   | 0.078    | 0.831      | 0.871       | 0.962       | 1.062       | 1.113                  | -0.235 + (Ht-Z * 0.532) | -0.402                 | 0.084    | 0.903      | 0.948       | 1.053       | 1.177       | 1.241                  | -0.144 + (Ht-Z * 0.490) |
| <b>18</b>                | -0.018   | 0.077    | 0.836      | 0.876       | 0.967       | 1.067       | 1.118                  | -0.251 + (Ht-Z * 0.523) | -0.402                 | 0.084    | 0.921      | 0.966       | 1.074       | 1.199       | 1.265                  | -0.194 + (Ht-Z * 0.527) |
| <b>19</b>                | -0.018   | 0.077    | 0.838      | 0.878       | 0.969       | 1.069       | 1.120                  | -0.301 + (Ht-Z * 0.542) | -0.402                 | 0.084    | 0.929      | 0.974       | 1.083       | 1.210       | 1.276                  | -0.191 + (Ht-Z * 0.547) |

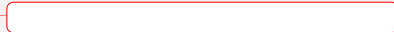

|           |                                            |                           |                                            |                           |
|-----------|--------------------------------------------|---------------------------|--------------------------------------------|---------------------------|
| <b>20</b> | -0.018 0.077 0.839 0.879 0.970 1.070 1.120 | $-0.318 + (Ht-Z * 0.483)$ | -0.402 0.084 0.933 0.979 1.088 1.215 1.282 | $-0.218 + (Ht-Z * 0.551)$ |
|-----------|--------------------------------------------|---------------------------|--------------------------------------------|---------------------------|

**Table 4** Age and Sex- Specific Reference percentiles for Lumbar Spine Bone Mineral Content for Black and Non-Black Children  
L, M, and S values to calculate Z-scores and Ht-Z prediction equations to calculate Height Adjusted Z-scores are also shown.

| Lumbar Spine BMC, g |       |       |       |       |       |       |                 |                         |       |       |       |       |       |       |        |                         |
|---------------------|-------|-------|-------|-------|-------|-------|-----------------|-------------------------|-------|-------|-------|-------|-------|-------|--------|-------------------------|
| Black Females       |       |       |       |       |       |       | Black Males     |                         |       |       |       |       |       |       |        |                         |
| Age,y               | L     | S     | M     |       |       |       |                 | Ht-Z Prediction         | L     | S     | M     |       |       |       |        | Ht-Z Prediction         |
|                     |       |       | 3rd   | 10th  | 50th  | 90th  | 97th            | Equation                |       |       | 3rd   | 10th  | 50th  | 90th  | 97th   | Equation                |
| 5                   | 0.457 | 0.180 | 10.72 | 12.14 | 15.49 | 19.29 | 21.22           | -0.453 + (Ht-Z * 0.477) | 0.069 | 0.154 | 11.31 | 12.43 | 15.15 | 18.41 | 20.16  | -0.537 + (Ht-Z * 0.611) |
| 6                   | 0.457 | 0.180 | 11.88 | 13.45 | 17.16 | 21.36 | 23.51           | -0.298 + (Ht-Z * 0.631) | 0.069 | 0.157 | 12.79 | 14.08 | 17.24 | 21.05 | 23.09  | -0.448 + (Ht-Z * 0.717) |
| 7                   | 0.457 | 0.180 | 13.08 | 14.81 | 18.89 | 23.52 | 25.88           | -0.067 + (Ht-Z * 0.615) | 0.069 | 0.160 | 14.35 | 15.83 | 19.46 | 23.86 | 26.24  | -0.379 + (Ht-Z * 0.625) |
| 8                   | 0.457 | 0.180 | 14.19 | 16.07 | 20.50 | 25.53 | 28.09           | 0.018 + (Ht-Z * 0.618)  | 0.069 | 0.164 | 15.74 | 17.40 | 21.49 | 26.46 | 29.14  | -0.325 + (Ht-Z * 0.643) |
| 9                   | 0.457 | 0.180 | 15.69 | 17.77 | 22.67 | 28.22 | 31.06           | -0.049 + (Ht-Z * 0.571) | 0.069 | 0.167 | 17.11 | 18.95 | 23.50 | 29.06 | 32.06  | -0.194 + (Ht-Z * 0.652) |
| 10                  | 0.457 | 0.180 | 18.13 | 20.53 | 26.19 | 32.61 | 35.89           | -0.300 + (Ht-Z * 0.664) | 0.069 | 0.171 | 18.64 | 20.70 | 25.80 | 32.06 | 35.45  | -0.266 + (Ht-Z * 0.593) |
| 11                  | 0.457 | 0.180 | 21.99 | 24.90 | 31.77 | 39.55 | 43.52           | -0.521 + (Ht-Z * 0.838) | 0.069 | 0.176 | 20.50 | 22.83 | 28.65 | 35.83 | 39.75  | -0.382 + (Ht-Z * 0.647) |
| 12                  | 0.457 | 0.180 | 26.90 | 30.46 | 38.86 | 48.38 | 53.24           | -0.476 + (Ht-Z * 0.898) | 0.069 | 0.183 | 23.14 | 25.89 | 32.80 | 41.39 | 46.11  | -0.450 + (Ht-Z * 0.709) |
| 13                  | 0.457 | 0.180 | 31.39 | 35.55 | 45.35 | 56.46 | 62.13           | -0.228 + (Ht-Z * 0.832) | 0.069 | 0.192 | 26.95 | 30.31 | 38.82 | 49.51 | 55.42  | -0.549 + (Ht-Z * 0.877) |
| 14                  | 0.457 | 0.180 | 35.13 | 39.78 | 50.75 | 63.19 | 69.54           | -0.064 + (Ht-Z * 0.767) | 0.069 | 0.197 | 32.10 | 36.23 | 46.73 | 59.99 | 67.36  | -0.373 + (Ht-Z * 0.823) |
| 15                  | 0.457 | 0.180 | 37.89 | 42.91 | 54.74 | 68.15 | 75.00           | -0.041 + (Ht-Z * 0.724) | 0.069 | 0.197 | 37.69 | 42.54 | 54.85 | 70.42 | 79.06  | -0.239 + (Ht-Z * 0.810) |
| 16                  | 0.457 | 0.180 | 39.79 | 45.06 | 57.48 | 71.56 | 78.75           | -0.040 + (Ht-Z * 0.756) | 0.069 | 0.193 | 42.52 | 47.88 | 61.47 | 78.58 | 88.05  | -0.098 + (Ht-Z * 0.783) |
| 17                  | 0.457 | 0.180 | 41.01 | 46.45 | 59.25 | 73.77 | 81.18           | -0.115 + (Ht-Z * 0.795) | 0.069 | 0.190 | 46.05 | 51.75 | 66.14 | 84.18 | 94.14  | -0.031 + (Ht-Z * 0.778) |
| 18                  | 0.457 | 0.180 | 41.79 | 47.32 | 60.37 | 75.16 | 82.72           | -0.102 + (Ht-Z * 0.783) | 0.069 | 0.188 | 48.32 | 54.21 | 69.07 | 87.64 | 97.88  | 0.029 + (Ht-Z * 0.775)  |
| 19                  | 0.457 | 0.180 | 42.33 | 47.93 | 61.15 | 76.13 | 83.78           | -0.141 + (Ht-Z * 0.730) | 0.069 | 0.186 | 49.74 | 55.75 | 70.87 | 89.75 | 100.14 | 0.076 + (Ht-Z * 0.804)  |
| 20                  | 0.457 | 0.180 | 42.80 | 48.47 | 61.84 | 76.99 | 84.72           | -0.164 + (Ht-Z * 0.760) | 0.069 | 0.185 | 50.73 | 56.82 | 72.13 | 91.21 | 101.70 | 0.093 + (Ht-Z * 0.855)  |
| Non-Black Females   |       |       |       |       |       |       | Non-Black Males |                         |       |       |       |       |       |       |        |                         |
| Age,y               | L     | S     | M     |       |       |       |                 | Ht-Z Prediction         | L     | S     | M     |       |       |       |        | Ht-Z Prediction         |
|                     |       |       | 3rd   | 10th  | 50th  | 90th  | 97th            | Equation                |       |       | 3rd   | 10th  | 50th  | 90th  | 97th   | Equation                |



|    |       |       |       |       |       |       |       |                         |       |       |       |       |       |       |       |                         |
|----|-------|-------|-------|-------|-------|-------|-------|-------------------------|-------|-------|-------|-------|-------|-------|-------|-------------------------|
| 5  | 0.122 | 0.137 | 11.10 | 12.09 | 14.44 | 17.18 | 18.62 | -0.305 + (Ht-Z * 0.851) | 0.058 | 0.141 | 10.60 | 11.55 | 13.86 | 16.59 | 18.05 | 0.085 + (Ht-Z * 0.664)  |
| 6  | 0.122 | 0.143 | 12.32 | 13.46 | 16.20 | 19.42 | 21.12 | -0.199 + (Ht-Z * 0.775) | 0.058 | 0.145 | 12.47 | 13.62 | 16.41 | 19.72 | 21.49 | -0.066 + (Ht-Z * 0.796) |
| 7  | 0.122 | 0.149 | 13.48 | 14.78 | 17.93 | 21.66 | 23.63 | -0.002 + (Ht-Z * 0.759) | 0.058 | 0.148 | 14.07 | 15.39 | 18.61 | 22.47 | 24.52 | -0.092 + (Ht-Z * 0.814) |
| 8  | 0.122 | 0.155 | 14.57 | 16.04 | 19.60 | 23.85 | 26.11 | 0.058 + (Ht-Z * 0.772)  | 0.058 | 0.151 | 15.56 | 17.06 | 20.72 | 25.11 | 27.46 | -0.097 + (Ht-Z * 0.838) |
| 9  | 0.122 | 0.162 | 15.74 | 17.40 | 21.48 | 26.38 | 29.00 | 0.041 + (Ht-Z * 0.744)  | 0.058 | 0.154 | 16.95 | 18.62 | 22.72 | 27.65 | 30.30 | -0.039 + (Ht-Z * 0.836) |
| 10 | 0.122 | 0.174 | 17.23 | 19.20 | 24.06 | 29.96 | 33.15 | -0.092 + (Ht-Z * 0.753) | 0.058 | 0.158 | 18.22 | 20.06 | 24.59 | 30.06 | 33.01 | -0.083 + (Ht-Z * 0.857) |
| 11 | 0.122 | 0.191 | 19.40 | 21.85 | 28.00 | 35.63 | 39.79 | -0.197 + (Ht-Z * 0.825) | 0.058 | 0.163 | 19.63 | 21.68 | 26.74 | 32.90 | 36.23 | -0.096 + (Ht-Z * 0.886) |
| 12 | 0.122 | 0.207 | 22.85 | 26.01 | 34.03 | 44.15 | 49.74 | -0.136 + (Ht-Z * 0.833) | 0.058 | 0.172 | 21.71 | 24.11 | 30.08 | 37.42 | 41.42 | -0.176 + (Ht-Z * 0.894) |
| 13 | 0.122 | 0.207 | 27.67 | 31.50 | 41.24 | 53.54 | 60.35 | -0.066 + (Ht-Z * 0.790) | 0.058 | 0.185 | 24.81 | 27.78 | 35.25 | 44.59 | 49.73 | -0.223 + (Ht-Z * 0.929) |
| 14 | 0.122 | 0.194 | 32.70 | 36.90 | 47.45 | 60.58 | 67.76 | -0.055 + (Ht-Z * 0.746) | 0.058 | 0.195 | 29.63 | 33.37 | 42.89 | 54.91 | 61.60 | -0.146 + (Ht-Z * 0.943) |
| 15 | 0.122 | 0.178 | 36.74 | 41.04 | 51.70 | 64.72 | 71.76 | -0.058 + (Ht-Z * 0.766) | 0.058 | 0.191 | 36.04 | 40.50 | 51.80 | 66.03 | 73.91 | -0.125 + (Ht-Z * 0.910) |
| 16 | 0.122 | 0.166 | 39.58 | 43.87 | 54.39 | 67.06 | 73.85 | -0.079 + (Ht-Z * 0.814) | 0.058 | 0.182 | 42.00 | 46.92 | 59.29 | 74.68 | 83.14 | -0.081 + (Ht-Z * 0.822) |
| 17 | 0.122 | 0.157 | 41.47 | 45.72 | 56.06 | 68.41 | 74.99 | -0.112 + (Ht-Z * 0.850) | 0.058 | 0.176 | 46.19 | 51.42 | 64.47 | 80.59 | 89.41 | -0.025 + (Ht-Z * 0.814) |
| 18 | 0.122 | 0.152 | 42.66 | 46.87 | 57.08 | 69.20 | 75.62 | -0.108 + (Ht-Z * 0.839) | 0.058 | 0.173 | 48.66 | 54.07 | 67.56 | 84.18 | 93.24 | -0.044 + (Ht-Z * 0.844) |
| 19 | 0.122 | 0.149 | 43.41 | 47.59 | 57.71 | 69.67 | 75.99 | -0.147 + (Ht-Z * 0.835) | 0.058 | 0.172 | 50.12 | 55.66 | 69.43 | 86.36 | 95.59 | -0.060 + (Ht-Z * 0.872) |
| 20 | 0.122 | 0.146 | 43.98 | 48.14 | 58.18 | 70.02 | 76.27 | -0.141 + (Ht-Z * 0.755) | 0.058 | 0.171 | 51.20 | 56.82 | 70.80 | 87.98 | 97.33 | -0.062 + (Ht-Z * 0.841) |

**Table 5** Age and Sex- Specific Reference percentiles for Total Hip Bone Mineral Content for Black and Non-Black Children  
L, M, and S values to calculate Z-scores and Ht-Z prediction equations to calculate Height Adjusted Z-scores are also shown.

| Total Hip BMC     |        |       |       |       |       |       |       |                           |        |       |       |       |       |       |       |                           |
|-------------------|--------|-------|-------|-------|-------|-------|-------|---------------------------|--------|-------|-------|-------|-------|-------|-------|---------------------------|
| Black Females     |        |       |       |       |       |       |       | Black Males               |        |       |       |       |       |       |       |                           |
| Age,y             | L      | S     | M     |       |       |       |       | Ht-Z Prediction           | L      | S     | M     |       |       |       |       | Ht-Z Prediction           |
|                   |        |       | 3rd   | 10th  | 50th  | 90th  | 97th  | Equation                  |        |       | 3rd   | 10th  | 50th  | 90th  | 97th  | Equation                  |
| 5                 | 0.485  | 0.198 | 5.32  | 6.12  | 8.02  | 10.18 | 11.29 | $0.673 + (Ht-Z * 0.409)$  | 0.208  | 0.161 | 6.40  | 7.09  | 8.75  | 10.70 | 11.72 | $0.216 + (Ht-Z * 0.650)$  |
| 6                 | 0.403  | 0.194 | 6.69  | 7.65  | 9.94  | 12.60 | 13.98 | $0.352 + (Ht-Z * 0.492)$  | 0.177  | 0.163 | 7.86  | 8.71  | 10.77 | 13.22 | 14.52 | $0.065 + (Ht-Z * 0.816)$  |
| 7                 | 0.314  | 0.191 | 8.19  | 9.29  | 11.97 | 15.15 | 16.82 | $0.290 + (Ht-Z * 0.476)$  | 0.145  | 0.165 | 9.36  | 10.38 | 12.87 | 15.85 | 17.45 | $-0.160 + (Ht-Z * 0.859)$ |
| 8                 | 0.226  | 0.187 | 9.62  | 10.85 | 13.87 | 17.51 | 19.45 | $0.140 + (Ht-Z * 0.540)$  | 0.112  | 0.168 | 10.95 | 12.15 | 15.10 | 18.68 | 20.60 | $-0.186 + (Ht-Z * 0.873)$ |
| 9                 | 0.130  | 0.183 | 11.18 | 12.53 | 15.89 | 20.00 | 22.23 | $-0.051 + (Ht-Z * 0.595)$ | 0.079  | 0.170 | 12.48 | 13.85 | 17.25 | 21.40 | 23.65 | $-0.275 + (Ht-Z * 0.665)$ |
| 10                | 0.019  | 0.178 | 13.08 | 14.56 | 18.29 | 22.95 | 25.52 | $-0.328 + (Ht-Z * 0.590)$ | 0.046  | 0.172 | 14.00 | 15.54 | 19.39 | 24.14 | 26.74 | $-0.290 + (Ht-Z * 0.688)$ |
| 11                | -0.107 | 0.172 | 15.45 | 17.09 | 21.25 | 26.56 | 29.55 | $-0.493 + (Ht-Z * 0.711)$ | 0.007  | 0.174 | 15.76 | 17.51 | 21.89 | 27.36 | 30.38 | $-0.366 + (Ht-Z * 0.711)$ |
| 12                | -0.237 | 0.167 | 18.05 | 19.83 | 24.42 | 30.40 | 33.83 | $-0.374 + (Ht-Z * 0.714)$ | -0.046 | 0.177 | 18.19 | 20.20 | 25.32 | 31.80 | 35.43 | $-0.495 + (Ht-Z * 0.694)$ |
| 13                | -0.353 | 0.162 | 20.32 | 22.22 | 27.13 | 33.63 | 37.42 | $-0.233 + (Ht-Z * 0.706)$ | -0.111 | 0.180 | 21.21 | 23.55 | 29.56 | 37.32 | 41.72 | $-0.583 + (Ht-Z * 0.840)$ |
| 14                | -0.445 | 0.158 | 22.08 | 24.04 | 29.17 | 36.04 | 40.09 | $-0.146 + (Ht-Z * 0.579)$ | -0.185 | 0.180 | 25.01 | 27.71 | 34.73 | 43.95 | 49.26 | $-0.478 + (Ht-Z * 0.793)$ |
| 15                | -0.508 | 0.155 | 23.26 | 25.27 | 30.53 | 37.62 | 41.84 | $-0.110 + (Ht-Z * 0.587)$ | -0.256 | 0.177 | 28.69 | 31.69 | 39.52 | 49.93 | 56.01 | $-0.369 + (Ht-Z * 0.753)$ |
| 16                | -0.547 | 0.153 | 23.98 | 26.01 | 31.34 | 38.56 | 42.88 | $-0.158 + (Ht-Z * 0.659)$ | -0.315 | 0.174 | 31.68 | 34.88 | 43.24 | 54.45 | 61.04 | $-0.347 + (Ht-Z * 0.729)$ |
| 17                | -0.567 | 0.152 | 24.35 | 26.40 | 31.76 | 39.05 | 43.42 | $-0.238 + (Ht-Z * 0.681)$ | -0.358 | 0.170 | 33.98 | 37.30 | 46.01 | 57.73 | 64.65 | $-0.222 + (Ht-Z * 0.636)$ |
| 18                | -0.576 | 0.152 | 24.54 | 26.58 | 31.97 | 39.29 | 43.69 | $-0.225 + (Ht-Z * 0.633)$ | -0.383 | 0.168 | 35.31 | 38.70 | 47.59 | 59.58 | 66.68 | $-0.216 + (Ht-Z * 0.668)$ |
| 19                | -0.582 | 0.152 | 24.64 | 26.69 | 32.09 | 39.43 | 43.84 | $-0.267 + (Ht-Z * 0.616)$ | -0.391 | 0.167 | 35.75 | 39.17 | 48.12 | 60.19 | 67.34 | $-0.210 + (Ht-Z * 0.718)$ |
| 20                | -0.587 | 0.151 | 24.74 | 26.80 | 32.20 | 39.56 | 43.98 | $-0.343 + (Ht-Z * 0.713)$ | -0.392 | 0.167 | 35.81 | 39.22 | 48.18 | 60.27 | 67.42 | $-0.105 + (Ht-Z * 0.756)$ |
| Non-Black Females |        |       |       |       |       |       |       | Non-Black Males           |        |       |       |       |       |       |       |                           |
| Age,y             | L      | S     | M     |       |       |       |       | Ht-Z Prediction           | L      | S     | M     |       |       |       |       | Ht-Z Prediction           |
|                   |        |       | 3rd   | 10th  | 50th  | 90th  | 97th  | Equation                  |        |       | 3rd   | 10th  | 50th  | 90th  | 97th  | Equation                  |

|           |        |       |       |       |       |       |       |                         |       |       |       |       |       |       |       |                         |
|-----------|--------|-------|-------|-------|-------|-------|-------|-------------------------|-------|-------|-------|-------|-------|-------|-------|-------------------------|
| <b>5</b>  | 0.188  | 0.164 | 5.45  | 6.04  | 7.49  | 9.21  | 10.11 | 0.387 + (Ht-Z * 0.648)  | 0.198 | 0.181 | 5.20  | 5.83  | 7.39  | 9.27  | 10.27 | 0.745 + (Ht-Z * 0.505)  |
| <b>6</b>  | 0.164  | 0.168 | 6.54  | 7.27  | 9.05  | 11.18 | 12.32 | 0.313 + (Ht-Z * 0.679)  | 0.198 | 0.181 | 6.48  | 7.27  | 9.21  | 11.55 | 12.79 | 0.509 + (Ht-Z * 0.548)  |
| <b>7</b>  | 0.139  | 0.172 | 7.64  | 8.51  | 10.64 | 13.21 | 14.60 | 0.235 + (Ht-Z * 0.750)  | 0.198 | 0.181 | 7.80  | 8.76  | 11.09 | 13.90 | 15.41 | 0.353 + (Ht-Z * 0.564)  |
| <b>8</b>  | 0.113  | 0.176 | 8.79  | 9.80  | 12.32 | 15.38 | 17.04 | 0.227 + (Ht-Z * 0.692)  | 0.198 | 0.181 | 9.21  | 10.33 | 13.09 | 16.41 | 18.18 | 0.209 + (Ht-Z * 0.682)  |
| <b>9</b>  | 0.083  | 0.180 | 10.03 | 11.20 | 14.14 | 17.77 | 19.75 | 0.112 + (Ht-Z * 0.724)  | 0.198 | 0.181 | 10.62 | 11.92 | 15.10 | 18.92 | 20.97 | 0.100 + (Ht-Z * 0.689)  |
| <b>10</b> | 0.049  | 0.185 | 11.45 | 12.81 | 16.25 | 20.55 | 22.93 | -0.113 + (Ht-Z * 0.721) | 0.198 | 0.181 | 12.00 | 13.47 | 17.06 | 21.39 | 23.70 | 0.028 + (Ht-Z * 0.827)  |
| <b>11</b> | 0.010  | 0.188 | 13.26 | 14.85 | 18.90 | 24.03 | 26.89 | -0.254 + (Ht-Z * 0.788) | 0.198 | 0.181 | 13.54 | 15.19 | 19.24 | 24.12 | 26.73 | -0.067 + (Ht-Z * 0.838) |
| <b>12</b> | -0.033 | 0.188 | 15.55 | 17.39 | 22.10 | 28.15 | 31.55 | -0.195 + (Ht-Z * 0.793) | 0.198 | 0.181 | 15.57 | 17.47 | 22.13 | 27.75 | 30.75 | -0.196 + (Ht-Z * 0.895) |
| <b>13</b> | -0.074 | 0.184 | 17.96 | 20.00 | 25.25 | 32.01 | 35.83 | -0.141 + (Ht-Z * 0.755) | 0.198 | 0.181 | 18.47 | 20.72 | 26.25 | 32.91 | 36.47 | -0.284 + (Ht-Z * 0.939) |
| <b>14</b> | -0.109 | 0.177 | 19.94 | 22.10 | 27.64 | 34.74 | 38.76 | -0.141 + (Ht-Z * 0.712) | 0.198 | 0.181 | 22.19 | 24.90 | 31.54 | 39.54 | 43.81 | -0.302 + (Ht-Z * 0.943) |
| <b>15</b> | -0.135 | 0.170 | 21.34 | 23.55 | 29.18 | 36.39 | 40.46 | -0.196 + (Ht-Z * 0.685) | 0.198 | 0.181 | 25.85 | 29.00 | 36.74 | 46.05 | 51.03 | -0.270 + (Ht-Z * 0.798) |
| <b>16</b> | -0.152 | 0.165 | 22.22 | 24.45 | 30.11 | 37.33 | 41.39 | -0.231 + (Ht-Z * 0.707) | 0.198 | 0.181 | 28.48 | 31.95 | 40.48 | 50.74 | 56.23 | -0.266 + (Ht-Z * 0.722) |
| <b>17</b> | -0.162 | 0.162 | 22.72 | 24.95 | 30.61 | 37.82 | 41.88 | -0.259 + (Ht-Z * 0.694) | 0.198 | 0.181 | 30.09 | 33.76 | 42.77 | 53.61 | 59.41 | -0.254 + (Ht-Z * 0.706) |
| <b>18</b> | -0.166 | 0.161 | 22.92 | 25.15 | 30.81 | 38.02 | 42.07 | -0.263 + (Ht-Z * 0.704) | 0.198 | 0.181 | 30.98 | 34.76 | 44.04 | 55.20 | 61.17 | -0.261 + (Ht-Z * 0.677) |
| <b>19</b> | -0.167 | 0.161 | 22.95 | 25.19 | 30.85 | 38.05 | 42.10 | -0.293 + (Ht-Z * 0.688) | 0.198 | 0.181 | 31.45 | 35.28 | 44.70 | 56.03 | 62.09 | -0.279 + (Ht-Z * 0.705) |
| <b>20</b> | -0.169 | 0.161 | 23.03 | 25.27 | 30.93 | 38.13 | 42.18 | -0.299 + (Ht-Z * 0.649) | 0.198 | 0.181 | 31.74 | 35.61 | 45.11 | 56.55 | 62.67 | -0.302 + (Ht-Z * 0.696) |

**Table 6** Age and Sex- Specific Reference percentiles for Total Hip areal Bone Mineral Density for Black and Non-Black Children  
L, M, and S values to calculate Z-scores and Ht-Z prediction equations to calculate Height Adjusted Z-scores are also shown.

| Total Hip aBMD    |        |       |       |       |       |       |                 |                         |       |       |       |          |       |       |                 |                         |
|-------------------|--------|-------|-------|-------|-------|-------|-----------------|-------------------------|-------|-------|-------|----------|-------|-------|-----------------|-------------------------|
| Black Females     |        |       |       |       |       |       |                 | Black Males             |       |       |       |          |       |       |                 |                         |
| Age,y             | L      | S     | M     |       |       |       | Ht-Z Prediction | Equation                | L     | S     | M     |          |       |       | Ht-Z Prediction |                         |
|                   | 3rd    | 10th  | 50th  | 90th  | 97th  | 3rd   | 10th            |                         | 50th  | 90th  | 97th  | Equation |       |       |                 |                         |
| 5                 | -0.226 | 0.096 | 0.489 | 0.517 | 0.584 | 0.661 | 0.701           | 0.217 + (Ht-Z * 0.503)  | 2.845 | 0.075 | 0.510 | 0.547    | 0.612 | 0.667 | 0.690           | 0.317 + (Ht-Z * 0.092)  |
| 6                 | -0.226 | 0.098 | 0.519 | 0.549 | 0.622 | 0.706 | 0.750           | 0.123 + (Ht-Z * 0.442)  | 2.632 | 0.083 | 0.541 | 0.584    | 0.661 | 0.725 | 0.753           | 0.084 + (Ht-Z * 0.334)  |
| 7                 | -0.226 | 0.100 | 0.548 | 0.581 | 0.659 | 0.750 | 0.798           | 0.096 + (Ht-Z * 0.302)  | 2.427 | 0.089 | 0.570 | 0.618    | 0.706 | 0.781 | 0.813           | -0.119 + (Ht-Z * 0.448) |
| 8                 | -0.226 | 0.102 | 0.572 | 0.607 | 0.690 | 0.788 | 0.840           | 0.029 + (Ht-Z * 0.317)  | 2.243 | 0.095 | 0.593 | 0.646    | 0.744 | 0.829 | 0.865           | -0.135 + (Ht-Z * 0.419) |
| 9                 | -0.226 | 0.104 | 0.594 | 0.631 | 0.720 | 0.824 | 0.880           | -0.087 + (Ht-Z * 0.316) | 2.080 | 0.100 | 0.612 | 0.669    | 0.776 | 0.869 | 0.909           | -0.167 + (Ht-Z * 0.318) |
| 10                | -0.226 | 0.107 | 0.621 | 0.660 | 0.756 | 0.868 | 0.928           | -0.274 + (Ht-Z * 0.331) | 1.920 | 0.104 | 0.629 | 0.690    | 0.805 | 0.906 | 0.950           | -0.156 + (Ht-Z * 0.353) |
| 11                | -0.226 | 0.110 | 0.661 | 0.704 | 0.809 | 0.934 | 1.001           | -0.366 + (Ht-Z * 0.498) | 1.739 | 0.109 | 0.650 | 0.714    | 0.837 | 0.949 | 0.998           | -0.251 + (Ht-Z * 0.310) |
| 12                | -0.226 | 0.114 | 0.709 | 0.757 | 0.874 | 1.014 | 1.090           | -0.296 + (Ht-Z * 0.532) | 1.517 | 0.115 | 0.678 | 0.746    | 0.881 | 1.006 | 1.062           | -0.336 + (Ht-Z * 0.318) |
| 13                | -0.226 | 0.118 | 0.750 | 0.803 | 0.931 | 1.086 | 1.169           | -0.203 + (Ht-Z * 0.545) | 1.254 | 0.121 | 0.718 | 0.790    | 0.938 | 1.081 | 1.146           | -0.486 + (Ht-Z * 0.494) |
| 14                | -0.226 | 0.121 | 0.783 | 0.839 | 0.977 | 1.143 | 1.233           | -0.098 + (Ht-Z * 0.468) | 0.970 | 0.126 | 0.766 | 0.842    | 1.003 | 1.166 | 1.242           | -0.368 + (Ht-Z * 0.441) |
| 15                | -0.226 | 0.123 | 0.803 | 0.861 | 1.005 | 1.179 | 1.274           | -0.069 + (Ht-Z * 0.446) | 0.698 | 0.130 | 0.816 | 0.893    | 1.065 | 1.247 | 1.334           | -0.233 + (Ht-Z * 0.371) |
| 16                | -0.226 | 0.124 | 0.814 | 0.874 | 1.021 | 1.200 | 1.297           | -0.069 + (Ht-Z * 0.467) | 0.464 | 0.132 | 0.857 | 0.935    | 1.114 | 1.311 | 1.409           | -0.148 + (Ht-Z * 0.329) |
| 17                | -0.226 | 0.125 | 0.820 | 0.880 | 1.030 | 1.211 | 1.310           | -0.142 + (Ht-Z * 0.501) | 0.289 | 0.133 | 0.885 | 0.964    | 1.148 | 1.355 | 1.461           | -0.043 + (Ht-Z * 0.313) |
| 18                | -0.226 | 0.125 | 0.822 | 0.883 | 1.034 | 1.216 | 1.315           | -0.126 + (Ht-Z * 0.505) | 0.175 | 0.134 | 0.903 | 0.981    | 1.168 | 1.382 | 1.494           | 0.010 + (Ht-Z * 0.347)  |
| 19                | -0.226 | 0.125 | 0.823 | 0.885 | 1.035 | 1.218 | 1.318           | -0.104 + (Ht-Z * 0.496) | 0.113 | 0.134 | 0.912 | 0.990    | 1.178 | 1.397 | 1.511           | 0.004 + (Ht-Z * 0.436)  |
| 20                | -0.226 | 0.125 | 0.824 | 0.885 | 1.036 | 1.220 | 1.319           | -0.188 + (Ht-Z * 0.598) | 0.080 | 0.135 | 0.917 | 0.995    | 1.184 | 1.404 | 1.521           | -0.021 + (Ht-Z * 0.433) |
| Non-Black Females |        |       |       |       |       |       |                 | Non-Black Males         |       |       |       |          |       |       |                 |                         |
| Age,y             | L      | S     | M     |       |       |       | Ht-Z Prediction | Equation                | L     | S     | M     |          |       |       | Ht-Z Prediction |                         |
|                   | 3rd    | 10th  | 50th  | 90th  | 97th  | 3rd   | 10th            |                         | 50th  | 90th  | 97th  | Equation |       |       |                 |                         |

|           |        |       |       |       |       |       |       |                         |       |       |       |       |       |       |       |                         |
|-----------|--------|-------|-------|-------|-------|-------|-------|-------------------------|-------|-------|-------|-------|-------|-------|-------|-------------------------|
| <b>5</b>  | -0.168 | 0.089 | 0.475 | 0.500 | 0.559 | 0.627 | 0.662 | -0.087 + (Ht-Z * 0.333) | 0.841 | 0.092 | 0.476 | 0.507 | 0.573 | 0.641 | 0.674 | 0.349 + (Ht-Z * 0.184)  |
| <b>6</b>  | -0.126 | 0.092 | 0.489 | 0.517 | 0.581 | 0.654 | 0.692 | 0.040 + (Ht-Z * 0.372)  | 0.841 | 0.096 | 0.501 | 0.536 | 0.610 | 0.685 | 0.721 | 0.267 + (Ht-Z * 0.254)  |
| <b>7</b>  | -0.083 | 0.096 | 0.504 | 0.533 | 0.603 | 0.682 | 0.723 | 0.138 + (Ht-Z * 0.465)  | 0.841 | 0.100 | 0.526 | 0.563 | 0.645 | 0.728 | 0.767 | 0.184 + (Ht-Z * 0.291)  |
| <b>8</b>  | -0.038 | 0.100 | 0.518 | 0.550 | 0.625 | 0.710 | 0.754 | 0.196 + (Ht-Z * 0.388)  | 0.841 | 0.103 | 0.547 | 0.588 | 0.676 | 0.767 | 0.810 | 0.109 + (Ht-Z * 0.372)  |
| <b>9</b>  | 0.016  | 0.104 | 0.534 | 0.568 | 0.650 | 0.742 | 0.790 | 0.141 + (Ht-Z * 0.420)  | 0.841 | 0.106 | 0.566 | 0.609 | 0.704 | 0.800 | 0.846 | 0.111 + (Ht-Z * 0.412)  |
| <b>10</b> | 0.083  | 0.110 | 0.553 | 0.592 | 0.682 | 0.784 | 0.837 | -0.028 + (Ht-Z * 0.482) | 0.841 | 0.109 | 0.582 | 0.628 | 0.728 | 0.830 | 0.879 | 0.075 + (Ht-Z * 0.434)  |
| <b>11</b> | 0.169  | 0.117 | 0.581 | 0.625 | 0.727 | 0.843 | 0.902 | -0.131 + (Ht-Z * 0.572) | 0.841 | 0.112 | 0.599 | 0.648 | 0.754 | 0.863 | 0.915 | 0.003 + (Ht-Z * 0.430)  |
| <b>12</b> | 0.268  | 0.122 | 0.623 | 0.673 | 0.790 | 0.921 | 0.987 | -0.108 + (Ht-Z * 0.613) | 0.841 | 0.115 | 0.621 | 0.673 | 0.788 | 0.905 | 0.961 | -0.084 + (Ht-Z * 0.470) |
| <b>13</b> | 0.370  | 0.125 | 0.670 | 0.726 | 0.856 | 1.000 | 1.072 | -0.078 + (Ht-Z * 0.590) | 0.841 | 0.119 | 0.654 | 0.712 | 0.838 | 0.967 | 1.028 | -0.174 + (Ht-Z * 0.537) |
| <b>14</b> | 0.459  | 0.124 | 0.709 | 0.770 | 0.907 | 1.058 | 1.132 | -0.087 + (Ht-Z * 0.529) | 0.841 | 0.123 | 0.701 | 0.766 | 0.907 | 1.051 | 1.120 | -0.160 + (Ht-Z * 0.550) |
| <b>15</b> | 0.527  | 0.122 | 0.735 | 0.798 | 0.940 | 1.092 | 1.168 | -0.114 + (Ht-Z * 0.508) | 0.841 | 0.125 | 0.752 | 0.823 | 0.978 | 1.137 | 1.213 | -0.154 + (Ht-Z * 0.440) |
| <b>16</b> | 0.573  | 0.121 | 0.751 | 0.815 | 0.959 | 1.112 | 1.187 | -0.120 + (Ht-Z * 0.522) | 0.841 | 0.127 | 0.791 | 0.867 | 1.032 | 1.202 | 1.283 | -0.133 + (Ht-Z * 0.418) |
| <b>17</b> | 0.599  | 0.120 | 0.760 | 0.824 | 0.969 | 1.122 | 1.198 | -0.149 + (Ht-Z * 0.499) | 0.841 | 0.128 | 0.815 | 0.894 | 1.066 | 1.242 | 1.326 | -0.129 + (Ht-Z * 0.402) |
| <b>18</b> | 0.610  | 0.120 | 0.763 | 0.828 | 0.973 | 1.127 | 1.202 | -0.149 + (Ht-Z * 0.492) | 0.841 | 0.128 | 0.829 | 0.909 | 1.085 | 1.265 | 1.351 | -0.136 + (Ht-Z * 0.413) |
| <b>19</b> | 0.612  | 0.120 | 0.764 | 0.829 | 0.974 | 1.127 | 1.202 | -0.181 + (Ht-Z * 0.483) | 0.841 | 0.128 | 0.836 | 0.917 | 1.095 | 1.277 | 1.363 | -0.156 + (Ht-Z * 0.466) |
| <b>20</b> | 0.615  | 0.120 | 0.765 | 0.830 | 0.975 | 1.129 | 1.204 | -0.235 + (Ht-Z * 0.453) | 0.841 | 0.128 | 0.840 | 0.922 | 1.100 | 1.283 | 1.371 | -0.226 + (Ht-Z * 0.456) |

**Table 7** Age and Sex- Specific Reference percentiles for Femoral Neck Bone Mineral Content for Black and Non-Black Children  
L, M, and S values to calculate Z-scores and Ht-Z prediction equations to calculate Height Adjusted Z-scores are also shown.

| Femoral Neck BMC  |       |       |                 |       |       |       |                  |                         |       |       |       |       |       |       |                  |                         |
|-------------------|-------|-------|-----------------|-------|-------|-------|------------------|-------------------------|-------|-------|-------|-------|-------|-------|------------------|-------------------------|
| Black Females     |       |       |                 |       |       |       |                  | Black Males             |       |       |       |       |       |       |                  |                         |
| Age,y             | L     | S     | M               |       |       |       |                  | Ht-Z Prediction         | L     | S     | M     |       |       |       |                  | Ht-Z Prediction         |
|                   |       |       | 3rd             | 10th  | 50th  | 90th  | 97 <sup>th</sup> | Equation                |       |       | 3rd   | 10th  | 50th  | 90th  | 97 <sup>th</sup> | Equation                |
| 5                 | 0.331 | 0.141 | 1.353           | 1.483 | 1.786 | 2.127 | 2.301            | -0.026 + (Ht-Z * 0.518) | 0.357 | 0.149 | 1.396 | 1.540 | 1.877 | 2.257 | 2.452            | -0.411 + (Ht-Z * 0.737) |
| 6                 | 0.331 | 0.142 | 1.469           | 1.610 | 1.942 | 2.316 | 2.507            | -0.104 + (Ht-Z * 0.517) | 0.357 | 0.149 | 1.585 | 1.748 | 2.130 | 2.562 | 2.783            | -0.339 + (Ht-Z * 0.487) |
| 7                 | 0.331 | 0.143 | 1.599           | 1.754 | 2.119 | 2.530 | 2.741            | 0.002 + (Ht-Z * 0.453)  | 0.357 | 0.149 | 1.776 | 1.959 | 2.387 | 2.871 | 3.119            | -0.360 + (Ht-Z * 0.485) |
| 8                 | 0.331 | 0.144 | 1.735           | 1.906 | 2.306 | 2.758 | 2.989            | -0.023 + (Ht-Z * 0.475) | 0.357 | 0.149 | 1.955 | 2.156 | 2.627 | 3.160 | 3.432            | -0.269 + (Ht-Z * 0.540) |
| 9                 | 0.331 | 0.146 | 1.897           | 2.085 | 2.527 | 3.028 | 3.284            | -0.056 + (Ht-Z * 0.469) | 0.357 | 0.149 | 2.114 | 2.332 | 2.841 | 3.418 | 3.712            | -0.192 + (Ht-Z * 0.490) |
| 10                | 0.331 | 0.147 | 2.093           | 2.303 | 2.798 | 3.359 | 3.646            | -0.265 + (Ht-Z * 0.433) | 0.357 | 0.149 | 2.265 | 2.498 | 3.044 | 3.661 | 3.977            | -0.182 + (Ht-Z * 0.510) |
| 11                | 0.331 | 0.149 | 2.331           | 2.569 | 3.128 | 3.763 | 4.089            | -0.377 + (Ht-Z * 0.575) | 0.357 | 0.149 | 2.436 | 2.687 | 3.274 | 3.938 | 4.278            | -0.304 + (Ht-Z * 0.540) |
| 12                | 0.331 | 0.151 | 2.579           | 2.846 | 3.475 | 4.190 | 4.557            | -0.287 + (Ht-Z * 0.629) | 0.357 | 0.149 | 2.671 | 2.946 | 3.590 | 4.318 | 4.690            | -0.344 + (Ht-Z * 0.483) |
| 13                | 0.331 | 0.153 | 2.793           | 3.085 | 3.776 | 4.562 | 4.967            | -0.120 + (Ht-Z * 0.529) | 0.357 | 0.149 | 2.980 | 3.286 | 4.004 | 4.817 | 5.232            | -0.441 + (Ht-Z * 0.643) |
| 14                | 0.331 | 0.154 | 2.958           | 3.271 | 4.011 | 4.855 | 5.289            | 0.031 + (Ht-Z * 0.478)  | 0.357 | 0.149 | 3.350 | 3.694 | 4.502 | 5.415 | 5.882            | -0.297 + (Ht-Z * 0.566) |
| 15                | 0.331 | 0.155 | 3.067           | 3.394 | 4.167 | 5.050 | 5.504            | 0.080 + (Ht-Z * 0.469)  | 0.357 | 0.149 | 3.713 | 4.094 | 4.989 | 6.002 | 6.519            | -0.208 + (Ht-Z * 0.565) |
| 16                | 0.331 | 0.156 | 3.131           | 3.466 | 4.260 | 5.166 | 5.633            | 0.008 + (Ht-Z * 0.593)  | 0.357 | 0.149 | 4.007 | 4.419 | 5.385 | 6.477 | 7.035            | -0.151 + (Ht-Z * 0.592) |
| 17                | 0.331 | 0.156 | 3.167           | 3.508 | 4.313 | 5.233 | 5.707            | -0.048 + (Ht-Z * 0.668) | 0.357 | 0.149 | 4.210 | 4.643 | 5.658 | 6.805 | 7.392            | -0.026 + (Ht-Z * 0.502) |
| 18                | 0.331 | 0.156 | 3.189           | 3.533 | 4.345 | 5.274 | 5.752            | -0.088 + (Ht-Z * 0.606) | 0.357 | 0.149 | 4.322 | 4.767 | 5.809 | 6.987 | 7.589            | 0.029 + (Ht-Z * 0.513)  |
| 19                | 0.331 | 0.156 | 3.206           | 3.552 | 4.369 | 5.304 | 5.786            | -0.172 + (Ht-Z * 0.524) | 0.357 | 0.149 | 4.363 | 4.812 | 5.864 | 7.053 | 7.661            | 0.007 + (Ht-Z * 0.659)  |
| 20                | 0.331 | 0.157 | 3.222           | 3.570 | 4.393 | 5.333 | 5.818            | -0.225 + (Ht-Z * 0.653) | 0.357 | 0.149 | 4.369 | 4.818 | 5.871 | 7.062 | 7.671            | 0.015 + (Ht-Z * 0.685)  |
| Non-Black Females |       |       |                 |       |       |       |                  | Non-Black Males         |       |       |       |       |       |       |                  |                         |
| Age,y             | L     | S     | M               |       |       |       |                  | Ht-Z Prediction         | L     | S     | M     |       |       |       |                  | Ht-Z Prediction         |
|                   |       |       | 3 <sup>rd</sup> | 10th  | 50th  | 90th  | 97 <sup>th</sup> | Equation                |       |       | 3rd   | 10th  | 50th  | 90th  | 97 <sup>th</sup> | Equation                |

|           |       |       |       |       |       |       |       |                         |       |       |       |       |       |       |       |                         |
|-----------|-------|-------|-------|-------|-------|-------|-------|-------------------------|-------|-------|-------|-------|-------|-------|-------|-------------------------|
| <b>5</b>  | 0.510 | 0.140 | 1.292 | 1.420 | 1.713 | 2.034 | 2.193 | -0.219 + (Ht-Z * 0.667) | 1.000 | 0.161 | 1.192 | 1.357 | 1.708 | 2.059 | 2.224 | 0.018 + (Ht-Z * 0.709)  |
| <b>6</b>  | 0.510 | 0.142 | 1.394 | 1.535 | 1.857 | 2.210 | 2.386 | -0.101 + (Ht-Z * 0.670) | 1.000 | 0.160 | 1.348 | 1.534 | 1.930 | 2.326 | 2.512 | 0.094 + (Ht-Z * 0.473)  |
| <b>7</b>  | 0.510 | 0.144 | 1.496 | 1.650 | 2.003 | 2.390 | 2.583 | 0.064 + (Ht-Z * 0.721)  | 1.000 | 0.160 | 1.506 | 1.713 | 2.154 | 2.595 | 2.802 | 0.084 + (Ht-Z * 0.569)  |
| <b>8</b>  | 0.510 | 0.147 | 1.602 | 1.770 | 2.156 | 2.580 | 2.791 | 0.128 + (Ht-Z * 0.666)  | 1.000 | 0.159 | 1.662 | 1.889 | 2.374 | 2.858 | 3.085 | 0.061 + (Ht-Z * 0.588)  |
| <b>9</b>  | 0.510 | 0.150 | 1.719 | 1.904 | 2.329 | 2.796 | 3.030 | 0.085 + (Ht-Z * 0.633)  | 1.000 | 0.159 | 1.808 | 2.054 | 2.579 | 3.104 | 3.350 | 0.040 + (Ht-Z * 0.599)  |
| <b>10</b> | 0.510 | 0.153 | 1.864 | 2.071 | 2.546 | 3.070 | 3.333 | -0.079 + (Ht-Z * 0.640) | 1.000 | 0.159 | 1.948 | 2.213 | 2.776 | 3.340 | 3.604 | 0.051 + (Ht-Z * 0.621)  |
| <b>11</b> | 0.510 | 0.157 | 2.057 | 2.293 | 2.836 | 3.436 | 3.736 | -0.170 + (Ht-Z * 0.731) | 1.000 | 0.158 | 2.101 | 2.385 | 2.990 | 3.595 | 3.879 | -0.022 + (Ht-Z * 0.619) |
| <b>12</b> | 0.510 | 0.160 | 2.308 | 2.577 | 3.199 | 3.887 | 4.232 | -0.145 + (Ht-Z * 0.720) | 1.000 | 0.157 | 2.297 | 2.606 | 3.263 | 3.921 | 4.229 | -0.145 + (Ht-Z * 0.668) |
| <b>13</b> | 0.510 | 0.159 | 2.575 | 2.873 | 3.563 | 4.325 | 4.708 | -0.098 + (Ht-Z * 0.674) | 1.000 | 0.157 | 2.575 | 2.918 | 3.650 | 4.382 | 4.725 | -0.176 + (Ht-Z * 0.693) |
| <b>14</b> | 0.510 | 0.156 | 2.793 | 3.109 | 3.839 | 4.643 | 5.046 | -0.090 + (Ht-Z * 0.647) | 1.000 | 0.156 | 2.934 | 3.322 | 4.148 | 4.975 | 5.363 | -0.125 + (Ht-Z * 0.708) |
| <b>15</b> | 0.510 | 0.153 | 2.942 | 3.266 | 4.012 | 4.833 | 5.244 | -0.092 + (Ht-Z * 0.639) | 1.000 | 0.155 | 3.289 | 3.720 | 4.639 | 5.558 | 5.990 | -0.115 + (Ht-Z * 0.577) |
| <b>16</b> | 0.510 | 0.150 | 3.033 | 3.360 | 4.112 | 4.938 | 5.352 | -0.114 + (Ht-Z * 0.676) | 1.000 | 0.154 | 3.569 | 4.034 | 5.024 | 6.015 | 6.480 | -0.086 + (Ht-Z * 0.519) |
| <b>17</b> | 0.510 | 0.148 | 3.082 | 3.410 | 4.164 | 4.992 | 5.406 | -0.132 + (Ht-Z * 0.659) | 1.000 | 0.153 | 3.760 | 4.247 | 5.285 | 6.323 | 6.810 | -0.078 + (Ht-Z * 0.512) |
| <b>18</b> | 0.510 | 0.148 | 3.101 | 3.430 | 4.185 | 5.013 | 5.427 | -0.144 + (Ht-Z * 0.648) | 1.000 | 0.153 | 3.878 | 4.379 | 5.445 | 6.512 | 7.012 | -0.056 + (Ht-Z * 0.489) |
| <b>19</b> | 0.510 | 0.148 | 3.104 | 3.433 | 4.189 | 5.017 | 5.431 | -0.099 + (Ht-Z * 0.603) | 1.000 | 0.153 | 3.951 | 4.460 | 5.544 | 6.628 | 7.136 | -0.128 + (Ht-Z * 0.543) |
| <b>20</b> | 0.510 | 0.147 | 3.115 | 3.444 | 4.200 | 5.028 | 5.442 | -0.196 + (Ht-Z * 0.579) | 1.000 | 0.153 | 4.005 | 4.520 | 5.616 | 6.713 | 7.228 | -0.245 + (Ht-Z * 0.536) |

**Table 8** Age and Sex- Specific Reference percentiles for Femoral Neck areal Bone Mineral Density for Black and Non-Black Children  
L, M, and S values to calculate Z-scores and Ht-Z prediction equations to calculate Height Adjusted Z-scores are also shown.

| Femoral Neck aBMD |       |       |       |       |       |       |       |                         |                 |       |       |          |       |       |       |                         |                 |
|-------------------|-------|-------|-------|-------|-------|-------|-------|-------------------------|-----------------|-------|-------|----------|-------|-------|-------|-------------------------|-----------------|
| Black Females     |       |       |       |       |       |       |       |                         | Black Males     |       |       |          |       |       |       |                         |                 |
| Age,y             | L     | S     | M     |       |       |       |       | Ht-Z Prediction         | Equation        | L     | S     | M        |       |       |       |                         | Ht-Z Prediction |
|                   | 3rd   | 10th  | 50th  | 90th  | 97th  | 3rd   | 10th  | 50th                    |                 | 90th  | 97th  | Equation |       |       |       |                         |                 |
| 5                 | 0.096 | 0.097 | 0.467 | 0.495 | 0.562 | 0.635 | 0.673 | 0.199 + (Ht-Z * 0.221)  | 2.418           | 0.092 | 0.462 | 0.503    | 0.578 | 0.640 | 0.667 | -0.085 + (Ht-Z * 0.255) |                 |
| 6                 | 0.096 | 0.101 | 0.485 | 0.516 | 0.587 | 0.667 | 0.708 | -0.025 + (Ht-Z * 0.312) | 2.284           | 0.096 | 0.495 | 0.542    | 0.626 | 0.698 | 0.728 | -0.019 + (Ht-Z * 0.109) |                 |
| 7                 | 0.096 | 0.104 | 0.505 | 0.538 | 0.616 | 0.703 | 0.748 | 0.058 + (Ht-Z * 0.232)  | 2.156           | 0.101 | 0.525 | 0.576    | 0.671 | 0.752 | 0.786 | -0.303 + (Ht-Z * 0.377) |                 |
| 8                 | 0.096 | 0.108 | 0.526 | 0.562 | 0.646 | 0.741 | 0.790 | 0.044 + (Ht-Z * 0.254)  | 2.042           | 0.105 | 0.550 | 0.605    | 0.708 | 0.797 | 0.836 | -0.235 + (Ht-Z * 0.339) |                 |
| 9                 | 0.096 | 0.113 | 0.548 | 0.587 | 0.679 | 0.784 | 0.837 | -0.039 + (Ht-Z * 0.236) | 1.941           | 0.109 | 0.569 | 0.628    | 0.738 | 0.835 | 0.877 | -0.245 + (Ht-Z * 0.266) |                 |
| 10                | 0.096 | 0.118 | 0.574 | 0.617 | 0.718 | 0.833 | 0.893 | -0.176 + (Ht-Z * 0.189) | 1.846           | 0.112 | 0.586 | 0.648    | 0.766 | 0.869 | 0.915 | -0.239 + (Ht-Z * 0.364) |                 |
| 11                | 0.096 | 0.123 | 0.605 | 0.653 | 0.765 | 0.895 | 0.963 | -0.254 + (Ht-Z * 0.334) | 1.744           | 0.116 | 0.605 | 0.670    | 0.795 | 0.907 | 0.956 | -0.248 + (Ht-Z * 0.245) |                 |
| 12                | 0.096 | 0.129 | 0.639 | 0.692 | 0.818 | 0.964 | 1.040 | -0.244 + (Ht-Z * 0.381) | 1.623           | 0.120 | 0.628 | 0.697    | 0.832 | 0.954 | 1.008 | -0.260 + (Ht-Z * 0.204) |                 |
| 13                | 0.096 | 0.135 | 0.670 | 0.728 | 0.867 | 1.029 | 1.114 | -0.161 + (Ht-Z * 0.320) | 1.483           | 0.125 | 0.658 | 0.731    | 0.878 | 1.013 | 1.074 | -0.339 + (Ht-Z * 0.339) |                 |
| 14                | 0.096 | 0.140 | 0.696 | 0.758 | 0.908 | 1.084 | 1.177 | -0.045 + (Ht-Z * 0.273) | 1.331           | 0.130 | 0.691 | 0.770    | 0.930 | 1.082 | 1.150 | -0.248 + (Ht-Z * 0.289) |                 |
| 15                | 0.096 | 0.143 | 0.712 | 0.777 | 0.935 | 1.122 | 1.221 | -0.004 + (Ht-Z * 0.309) | 1.181           | 0.136 | 0.725 | 0.809    | 0.983 | 1.151 | 1.229 | -0.190 + (Ht-Z * 0.296) |                 |
| 16                | 0.096 | 0.146 | 0.721 | 0.788 | 0.952 | 1.145 | 1.248 | -0.013 + (Ht-Z * 0.365) | 1.048           | 0.140 | 0.754 | 0.842    | 1.028 | 1.212 | 1.298 | -0.084 + (Ht-Z * 0.296) |                 |
| 17                | 0.096 | 0.147 | 0.726 | 0.795 | 0.961 | 1.159 | 1.263 | -0.049 + (Ht-Z * 0.412) | 0.943           | 0.144 | 0.775 | 0.866    | 1.060 | 1.257 | 1.350 | 0.056 + (Ht-Z * 0.268)  |                 |
| 18                | 0.096 | 0.148 | 0.729 | 0.798 | 0.966 | 1.166 | 1.271 | -0.098 + (Ht-Z * 0.389) | 0.872           | 0.147 | 0.788 | 0.880    | 1.080 | 1.286 | 1.384 | 0.118 + (Ht-Z * 0.270)  |                 |
| 19                | 0.096 | 0.148 | 0.730 | 0.800 | 0.969 | 1.169 | 1.276 | -0.065 + (Ht-Z * 0.368) | 0.832           | 0.148 | 0.795 | 0.888    | 1.091 | 1.302 | 1.402 | 0.080 + (Ht-Z * 0.347)  |                 |
| 20                | 0.096 | 0.149 | 0.731 | 0.801 | 0.971 | 1.172 | 1.279 | -0.149 + (Ht-Z * 0.440) | 0.808           | 0.149 | 0.799 | 0.892    | 1.098 | 1.311 | 1.413 | 0.081 + (Ht-Z * 0.408)  |                 |
| Non-Black Females |       |       |       |       |       |       |       |                         | Non-Black Males |       |       |          |       |       |       |                         |                 |
| Age,y             | L     | S     | M     |       |       |       |       | Ht-Z Prediction         | Equation        | L     | S     | M        |       |       |       |                         | Ht-Z Prediction |
|                   | 3rd   | 10th  | 50th  | 90th  | 97th  | 3rd   | 10th  | 50th                    |                 | 90th  | 97th  | Equation |       |       |       |                         |                 |



|    |        |       |       |       |       |       |       |                         |       |       |       |       |       |       |       |                         |
|----|--------|-------|-------|-------|-------|-------|-------|-------------------------|-------|-------|-------|-------|-------|-------|-------|-------------------------|
| 5  | -0.419 | 0.087 | 0.461 | 0.485 | 0.541 | 0.606 | 0.641 | -0.379 + (Ht-Z * 0.349) | 0.543 | 0.098 | 0.449 | 0.479 | 0.546 | 0.616 | 0.651 | 0.171 + (Ht-Z * 0.183)  |
| 6  | -0.367 | 0.090 | 0.472 | 0.497 | 0.557 | 0.627 | 0.664 | -0.185 + (Ht-Z * 0.376) | 0.543 | 0.101 | 0.473 | 0.506 | 0.578 | 0.655 | 0.693 | 0.046 + (Ht-Z * 0.205)  |
| 7  | -0.312 | 0.094 | 0.484 | 0.511 | 0.574 | 0.649 | 0.688 | -0.050 + (Ht-Z * 0.475) | 0.543 | 0.104 | 0.497 | 0.532 | 0.611 | 0.694 | 0.735 | 0.034 + (Ht-Z * 0.282)  |
| 8  | -0.252 | 0.097 | 0.496 | 0.525 | 0.593 | 0.673 | 0.715 | 0.075 + (Ht-Z * 0.379)  | 0.543 | 0.107 | 0.518 | 0.555 | 0.640 | 0.730 | 0.774 | -0.022 + (Ht-Z * 0.346) |
| 9  | -0.181 | 0.101 | 0.509 | 0.540 | 0.614 | 0.700 | 0.745 | 0.091 + (Ht-Z * 0.403)  | 0.543 | 0.109 | 0.536 | 0.576 | 0.666 | 0.761 | 0.808 | 0.006 + (Ht-Z * 0.384)  |
| 10 | -0.087 | 0.107 | 0.526 | 0.560 | 0.642 | 0.736 | 0.786 | 0.003 + (Ht-Z * 0.415)  | 0.543 | 0.111 | 0.552 | 0.594 | 0.688 | 0.789 | 0.839 | 0.028 + (Ht-Z * 0.363)  |
| 11 | 0.037  | 0.113 | 0.549 | 0.588 | 0.680 | 0.786 | 0.841 | -0.058 + (Ht-Z * 0.484) | 0.543 | 0.113 | 0.567 | 0.612 | 0.712 | 0.818 | 0.870 | 0.011 + (Ht-Z * 0.354)  |
| 12 | 0.186  | 0.121 | 0.580 | 0.625 | 0.731 | 0.852 | 0.913 | -0.047 + (Ht-Z * 0.470) | 0.543 | 0.116 | 0.586 | 0.633 | 0.739 | 0.852 | 0.908 | -0.043 + (Ht-Z * 0.397) |
| 13 | 0.341  | 0.126 | 0.616 | 0.668 | 0.788 | 0.922 | 0.989 | -0.044 + (Ht-Z * 0.456) | 0.543 | 0.119 | 0.611 | 0.662 | 0.777 | 0.900 | 0.960 | -0.079 + (Ht-Z * 0.385) |
| 14 | 0.476  | 0.129 | 0.644 | 0.702 | 0.833 | 0.976 | 1.047 | -0.048 + (Ht-Z * 0.399) | 0.543 | 0.124 | 0.646 | 0.702 | 0.829 | 0.965 | 1.032 | -0.065 + (Ht-Z * 0.399) |
| 15 | 0.578  | 0.130 | 0.663 | 0.724 | 0.862 | 1.010 | 1.083 | -0.024 + (Ht-Z * 0.389) | 0.543 | 0.129 | 0.682 | 0.745 | 0.885 | 1.036 | 1.111 | -0.064 + (Ht-Z * 0.282) |
| 16 | 0.644  | 0.130 | 0.673 | 0.736 | 0.879 | 1.029 | 1.103 | -0.035 + (Ht-Z * 0.417) | 0.543 | 0.133 | 0.713 | 0.780 | 0.933 | 1.098 | 1.180 | -0.068 + (Ht-Z * 0.259) |
| 17 | 0.680  | 0.131 | 0.678 | 0.742 | 0.887 | 1.039 | 1.113 | -0.028 + (Ht-Z * 0.371) | 0.543 | 0.136 | 0.734 | 0.805 | 0.967 | 1.143 | 1.230 | -0.051 + (Ht-Z * 0.275) |
| 18 | 0.692  | 0.131 | 0.679 | 0.744 | 0.889 | 1.042 | 1.116 | -0.040 + (Ht-Z * 0.370) | 0.543 | 0.138 | 0.745 | 0.819 | 0.986 | 1.167 | 1.257 | -0.041 + (Ht-Z * 0.283) |
| 19 | 0.697  | 0.131 | 0.680 | 0.745 | 0.890 | 1.043 | 1.117 | -0.060 + (Ht-Z * 0.356) | 0.543 | 0.139 | 0.749 | 0.824 | 0.993 | 1.177 | 1.268 | -0.061 + (Ht-Z * 0.314) |
| 20 | 0.710  | 0.131 | 0.682 | 0.747 | 0.893 | 1.046 | 1.121 | -0.153 + (Ht-Z * 0.319) | 0.543 | 0.139 | 0.750 | 0.825 | 0.994 | 1.179 | 1.270 | -0.158 + (Ht-Z * 0.299) |

**Table 9** Age and Sex- Specific Reference percentiles for Distal One-Third Radius Bone Mineral Content for Black and Non-Black Children  
L, M, and S values to calculate Z-scores and Ht-Z prediction equations to calculate Height Adjusted Z-scores are also shown.

| Distal One Third Radius BMC |       |       |       |       |       |       |       |                         |       |       |       |       |       |       |       |                        |
|-----------------------------|-------|-------|-------|-------|-------|-------|-------|-------------------------|-------|-------|-------|-------|-------|-------|-------|------------------------|
| Black Females               |       |       |       |       |       |       |       | Black Males             |       |       |       |       |       |       |       |                        |
| Age,y                       | L     | S     | M     |       |       |       |       | Ht-Z Prediction         | L     | S     | M     |       |       |       |       | Ht-Z Prediction        |
|                             |       |       | 3rd   | 10th  | 50th  | 90th  | 97th  | Equation                |       |       | 3rd   | 10th  | 50th  | 90th  | 97th  | Equation               |
| 5                           | 1.000 | 0.132 | 0.606 | 0.669 | 0.805 | 0.941 | 1.004 | -0.218 + (Ht-Z * 0.552) | 0.240 | 0.119 | 0.654 | 0.705 | 0.824 | 0.957 | 1.025 | -0.377 + (Ht-Z *0.641) |
| 6                           | 1.000 | 0.130 | 0.656 | 0.724 | 0.869 | 1.013 | 1.081 | -0.196 + (Ht-Z * 0.606) | 0.240 | 0.121 | 0.721 | 0.778 | 0.911 | 1.061 | 1.137 | -0.216 + (Ht-Z *0.580) |
| 7                           | 1.000 | 0.128 | 0.715 | 0.788 | 0.942 | 1.097 | 1.169 | -0.065 + (Ht-Z * 0.542) | 0.240 | 0.123 | 0.787 | 0.850 | 0.999 | 1.166 | 1.252 | -0.275 + (Ht-Z *0.394) |
| 8                           | 1.000 | 0.126 | 0.777 | 0.854 | 1.019 | 1.184 | 1.261 | 0.033 + (Ht-Z * 0.494)  | 0.240 | 0.125 | 0.853 | 0.923 | 1.087 | 1.273 | 1.368 | -0.169 + (Ht-Z *0.368) |
| 9                           | 1.000 | 0.124 | 0.845 | 0.927 | 1.102 | 1.277 | 1.359 | -0.029 + (Ht-Z * 0.413) | 0.240 | 0.127 | 0.917 | 0.994 | 1.174 | 1.378 | 1.482 | -0.108 + (Ht-Z *0.391) |
| 10                          | 1.000 | 0.122 | 0.927 | 1.015 | 1.202 | 1.389 | 1.477 | -0.201 + (Ht-Z * 0.461) | 0.240 | 0.130 | 0.980 | 1.063 | 1.259 | 1.482 | 1.596 | -0.157 + (Ht-Z *0.412) |
| 11                          | 1.000 | 0.119 | 1.031 | 1.126 | 1.328 | 1.531 | 1.626 | -0.402 + (Ht-Z * 0.660) | 0.240 | 0.132 | 1.048 | 1.139 | 1.353 | 1.596 | 1.721 | -0.293 + (Ht-Z *0.444) |
| 12                          | 1.000 | 0.116 | 1.150 | 1.253 | 1.471 | 1.690 | 1.793 | -0.305 + (Ht-Z * 0.695) | 0.240 | 0.134 | 1.135 | 1.235 | 1.472 | 1.741 | 1.880 | -0.346 + (Ht-Z *0.407) |
| 13                          | 1.000 | 0.113 | 1.262 | 1.371 | 1.604 | 1.836 | 1.945 | -0.059 + (Ht-Z * 0.519) | 0.240 | 0.135 | 1.250 | 1.362 | 1.625 | 1.926 | 2.081 | -0.418 + (Ht-Z *0.527) |
| 14                          | 1.000 | 0.111 | 1.352 | 1.466 | 1.708 | 1.950 | 2.064 | -0.031 + (Ht-Z * 0.658) | 0.240 | 0.134 | 1.389 | 1.512 | 1.802 | 2.132 | 2.302 | -0.241 + (Ht-Z *0.548) |
| 15                          | 1.000 | 0.109 | 1.416 | 1.533 | 1.782 | 2.030 | 2.147 | -0.027 + (Ht-Z * 0.601) | 0.240 | 0.130 | 1.533 | 1.665 | 1.973 | 2.324 | 2.504 | -0.084 + (Ht-Z *0.522) |
| 16                          | 1.000 | 0.108 | 1.461 | 1.580 | 1.832 | 2.085 | 2.203 | -0.077 + (Ht-Z * 0.729) | 0.240 | 0.125 | 1.664 | 1.800 | 2.118 | 2.476 | 2.660 | -0.027 + (Ht-Z *0.537) |
| 17                          | 1.000 | 0.107 | 1.492 | 1.611 | 1.866 | 2.121 | 2.241 | -0.156 + (Ht-Z * 0.756) | 0.240 | 0.119 | 1.772 | 1.910 | 2.229 | 2.587 | 2.769 | 0.024 + (Ht-Z *0.505)  |
| 18                          | 1.000 | 0.106 | 1.515 | 1.635 | 1.892 | 2.149 | 2.270 | -0.225 + (Ht-Z * 0.767) | 0.240 | 0.113 | 1.856 | 1.993 | 2.310 | 2.663 | 2.843 | 0.063 + (Ht-Z *0.489)  |
| 19                          | 1.000 | 0.105 | 1.536 | 1.657 | 1.916 | 2.174 | 2.295 | -0.242 + (Ht-Z * 0.675) | 0.240 | 0.109 | 1.921 | 2.056 | 2.369 | 2.717 | 2.893 | 0.040 + (Ht-Z *0.577)  |
| 20                          | 1.000 | 0.105 | 1.557 | 1.679 | 1.939 | 2.199 | 2.322 | -0.254 + (Ht-Z * 0.664) | 0.240 | 0.105 | 1.976 | 2.110 | 2.419 | 2.761 | 2.933 | 0.103 + (Ht-Z *0.476)  |
| Non-Black Females           |       |       |       |       |       |       |       | Non-Black Males         |       |       |       |       |       |       |       |                        |
|                             | L     | S     | M     |       |       |       |       | Ht-Z Prediction         | L     | S     | M     |       |       |       |       | Ht-Z Prediction        |

| Age,y | 3rd   | 10th  | 50th  | 90th  | 97th  | Equation | 3rd   | 10th                    | 50th  | 90th  | 97th  | Equation |       |       |       |                         |
|-------|-------|-------|-------|-------|-------|----------|-------|-------------------------|-------|-------|-------|----------|-------|-------|-------|-------------------------|
| 5     | 1.000 | 0.132 | 0.541 | 0.598 | 0.719 | 0.839    | 0.896 | -0.227 + (Ht-Z * 0.607) | 1.000 | 0.114 | 0.568 | 0.617    | 0.722 | 0.827 | 0.876 | 0.084 + (Ht-Z * 0.665)  |
| 6     | 1.000 | 0.133 | 0.586 | 0.648 | 0.781 | 0.913    | 0.975 | -0.063 + (Ht-Z * 0.465) | 1.000 | 0.117 | 0.632 | 0.688    | 0.809 | 0.930 | 0.986 | -0.054 + (Ht-Z * 0.557) |
| 7     | 1.000 | 0.134 | 0.632 | 0.700 | 0.844 | 0.989    | 1.056 | 0.046 + (Ht-Z * 0.447)  | 1.000 | 0.119 | 0.691 | 0.755    | 0.891 | 1.027 | 1.091 | -0.049 + (Ht-Z * 0.438) |
| 8     | 1.000 | 0.135 | 0.679 | 0.753 | 0.909 | 1.066    | 1.139 | 0.085 + (Ht-Z * 0.433)  | 1.000 | 0.122 | 0.745 | 0.816    | 0.966 | 1.117 | 1.187 | -0.112 + (Ht-Z * 0.586) |
| 9     | 1.000 | 0.136 | 0.729 | 0.808 | 0.978 | 1.148    | 1.228 | 0.080 + (Ht-Z * 0.517)  | 1.000 | 0.124 | 0.795 | 0.872    | 1.036 | 1.200 | 1.277 | -0.012 + (Ht-Z * 0.539) |
| 10    | 1.000 | 0.137 | 0.787 | 0.874 | 1.060 | 1.245    | 1.332 | -0.041 + (Ht-Z * 0.474) | 1.000 | 0.126 | 0.842 | 0.926    | 1.104 | 1.282 | 1.366 | -0.047 + (Ht-Z * 0.570) |
| 11    | 1.000 | 0.137 | 0.863 | 0.959 | 1.163 | 1.367    | 1.463 | -0.163 + (Ht-Z * 0.523) | 1.000 | 0.128 | 0.897 | 0.988    | 1.182 | 1.376 | 1.467 | -0.097 + (Ht-Z * 0.536) |
| 12    | 1.000 | 0.135 | 0.963 | 1.068 | 1.291 | 1.515    | 1.620 | -0.106 + (Ht-Z * 0.621) | 1.000 | 0.131 | 0.969 | 1.070    | 1.285 | 1.500 | 1.601 | -0.166 + (Ht-Z * 0.572) |
| 13    | 1.000 | 0.131 | 1.072 | 1.184 | 1.421 | 1.659    | 1.770 | 0.002 + (Ht-Z * 0.608)  | 1.000 | 0.133 | 1.069 | 1.182    | 1.424 | 1.665 | 1.779 | -0.235 + (Ht-Z * 0.650) |
| 14    | 1.000 | 0.124 | 1.168 | 1.281 | 1.524 | 1.766    | 1.880 | 0.034 + (Ht-Z * 0.518)  | 1.000 | 0.132 | 1.205 | 1.333    | 1.604 | 1.876 | 2.004 | -0.147 + (Ht-Z * 0.670) |
| 15    | 1.000 | 0.119 | 1.240 | 1.354 | 1.596 | 1.838    | 1.952 | -0.015 + (Ht-Z * 0.515) | 1.000 | 0.129 | 1.360 | 1.500    | 1.797 | 2.094 | 2.234 | -0.121 + (Ht-Z * 0.605) |
| 16    | 1.000 | 0.114 | 1.292 | 1.405 | 1.646 | 1.887    | 2.000 | -0.053 + (Ht-Z * 0.514) | 1.000 | 0.125 | 1.499 | 1.646    | 1.960 | 2.273 | 2.421 | -0.057 + (Ht-Z * 0.519) |
| 17    | 1.000 | 0.111 | 1.329 | 1.442 | 1.682 | 1.921    | 2.034 | -0.102 + (Ht-Z * 0.509) | 1.000 | 0.121 | 1.603 | 1.754    | 2.076 | 2.398 | 2.550 | -0.008 + (Ht-Z * 0.468) |
| 18    | 1.000 | 0.109 | 1.358 | 1.470 | 1.708 | 1.947    | 2.059 | -0.099 + (Ht-Z * 0.504) | 1.000 | 0.118 | 1.677 | 1.830    | 2.156 | 2.482 | 2.635 | -0.041 + (Ht-Z * 0.549) |
| 19    | 1.000 | 0.107 | 1.381 | 1.492 | 1.730 | 1.967    | 2.079 | -0.136 + (Ht-Z * 0.540) | 1.000 | 0.116 | 1.731 | 1.885    | 2.213 | 2.542 | 2.696 | 0.000 + (Ht-Z * 0.575)  |
| 20    | 1.000 | 0.106 | 1.402 | 1.513 | 1.749 | 1.986    | 2.097 | -0.141 + (Ht-Z * 0.493) | 1.000 | 0.114 | 1.777 | 1.932    | 2.262 | 2.592 | 2.747 | 0.012 + (Ht-Z * 0.575)  |

**Table 10** Age and Sex- Specific Reference percentiles for Distal One Third Radius areal Bone Mineral Density for Black and Non-Black Children  
L, M, and S values to calculate Z-scores and Ht-Z prediction equations to calculate Height Adjusted Z-scores are also shown.

| Distal One Third Radius aBMD |       |       |       |       |       |       |                 |                         |       |       |       |          |       |       |                 |                        |
|------------------------------|-------|-------|-------|-------|-------|-------|-----------------|-------------------------|-------|-------|-------|----------|-------|-------|-----------------|------------------------|
| Black Females                |       |       |       |       |       |       |                 | Black Males             |       |       |       |          |       |       |                 |                        |
| Age,y                        | L     | S     | M     |       |       |       | Ht-Z Prediction | Equation                | L     | S     | M     |          |       |       | Ht-Z Prediction |                        |
|                              | 3rd   | 10th  | 50th  | 90th  | 97th  | 3rd   | 10th            |                         | 50th  | 90th  | 97th  | Equation |       |       |                 |                        |
| 5                            | 0.332 | 0.078 | 0.377 | 0.396 | 0.439 | 0.484 | 0.506           | -0.643 + (Ht-Z * 0.696) | 1.482 | 0.085 | 0.362 | 0.386    | 0.435 | 0.481 | 0.502           | -0.442 + (Ht-Z *0.344) |
| 6                            | 0.332 | 0.077 | 0.393 | 0.413 | 0.456 | 0.503 | 0.526           | -0.449 + (Ht-Z * 0.510) | 1.482 | 0.085 | 0.385 | 0.410    | 0.462 | 0.511 | 0.534           | -0.180 + (Ht-Z *0.382) |
| 7                            | 0.332 | 0.076 | 0.411 | 0.431 | 0.476 | 0.524 | 0.548           | -0.163 + (Ht-Z * 0.450) | 1.482 | 0.085 | 0.407 | 0.434    | 0.489 | 0.541 | 0.564           | -0.187 + (Ht-Z *0.122) |
| 8                            | 0.332 | 0.076 | 0.428 | 0.449 | 0.495 | 0.545 | 0.569           | -0.005 + (Ht-Z * 0.379) | 1.482 | 0.085 | 0.427 | 0.456    | 0.513 | 0.567 | 0.592           | -0.232 + (Ht-Z *0.186) |
| 9                            | 0.332 | 0.075 | 0.446 | 0.468 | 0.516 | 0.567 | 0.592           | -0.045 + (Ht-Z * 0.279) | 1.482 | 0.085 | 0.446 | 0.475    | 0.535 | 0.592 | 0.618           | -0.142 + (Ht-Z *0.268) |
| 10                           | 0.332 | 0.074 | 0.469 | 0.491 | 0.540 | 0.593 | 0.619           | -0.151 + (Ht-Z * 0.285) | 1.482 | 0.085 | 0.463 | 0.493    | 0.556 | 0.615 | 0.642           | -0.296 + (Ht-Z *0.182) |
| 11                           | 0.332 | 0.073 | 0.496 | 0.519 | 0.571 | 0.626 | 0.653           | -0.235 + (Ht-Z * 0.419) | 1.482 | 0.085 | 0.481 | 0.512    | 0.577 | 0.638 | 0.666           | -0.314 + (Ht-Z *0.220) |
| 12                           | 0.332 | 0.072 | 0.527 | 0.551 | 0.605 | 0.663 | 0.691           | -0.234 + (Ht-Z * 0.534) | 1.482 | 0.085 | 0.501 | 0.534    | 0.601 | 0.665 | 0.694           | -0.317 + (Ht-Z *0.276) |
| 13                           | 0.332 | 0.071 | 0.556 | 0.581 | 0.637 | 0.697 | 0.726           | -0.047 + (Ht-Z * 0.430) | 1.482 | 0.085 | 0.524 | 0.559    | 0.630 | 0.697 | 0.727           | -0.292 + (Ht-Z *0.290) |
| 14                           | 0.332 | 0.070 | 0.579 | 0.605 | 0.663 | 0.724 | 0.754           | 0.055 + (Ht-Z * 0.450)  | 1.482 | 0.085 | 0.552 | 0.589    | 0.663 | 0.733 | 0.765           | -0.155 + (Ht-Z *0.366) |
| 15                           | 0.332 | 0.069 | 0.597 | 0.623 | 0.682 | 0.744 | 0.775           | 0.043 + (Ht-Z * 0.390)  | 1.482 | 0.085 | 0.581 | 0.619    | 0.697 | 0.771 | 0.805           | 0.047 + (Ht-Z *0.326)  |
| 16                           | 0.332 | 0.069 | 0.609 | 0.636 | 0.695 | 0.758 | 0.789           | 0.021 + (Ht-Z * 0.427)  | 1.482 | 0.085 | 0.606 | 0.646    | 0.728 | 0.805 | 0.840           | 0.070 + (Ht-Z *0.376)  |
| 17                           | 0.332 | 0.069 | 0.618 | 0.645 | 0.705 | 0.769 | 0.800           | -0.038 + (Ht-Z * 0.527) | 1.482 | 0.085 | 0.627 | 0.669    | 0.753 | 0.833 | 0.869           | 0.149 + (Ht-Z *0.315)  |
| 18                           | 0.332 | 0.068 | 0.626 | 0.653 | 0.713 | 0.777 | 0.809           | -0.081 + (Ht-Z * 0.560) | 1.482 | 0.085 | 0.643 | 0.686    | 0.772 | 0.854 | 0.891           | 0.224 + (Ht-Z *0.256)  |
| 19                           | 0.332 | 0.068 | 0.633 | 0.660 | 0.721 | 0.786 | 0.817           | -0.189 + (Ht-Z * 0.578) | 1.482 | 0.085 | 0.655 | 0.699    | 0.787 | 0.870 | 0.908           | 0.149 + (Ht-Z *0.331)  |
| 20                           | 0.332 | 0.068 | 0.641 | 0.668 | 0.729 | 0.794 | 0.826           | -0.174 + (Ht-Z * 0.422) | 1.482 | 0.085 | 0.666 | 0.710    | 0.799 | 0.884 | 0.923           | 0.230 + (Ht-Z *0.344)  |
| Non-Black Females            |       |       |       |       |       |       |                 | Non-Black Males         |       |       |       |          |       |       |                 |                        |
| Age,y                        | L     | S     | M     |       |       |       | Ht-Z Prediction | Equation                | L     | S     | M     |          |       |       | Ht-Z Prediction |                        |
|                              | 3rd   | 10th  | 50th  | 90th  | 97th  | 3rd   | 10th            |                         | 50th  | 90th  | 97th  | Equation |       |       |                 |                        |

|           |       |       |       |       |       |       |       |                         |       |       |       |       |       |       |       |                         |
|-----------|-------|-------|-------|-------|-------|-------|-------|-------------------------|-------|-------|-------|-------|-------|-------|-------|-------------------------|
| <b>5</b>  | 1.069 | 0.075 | 0.350 | 0.368 | 0.408 | 0.447 | 0.465 | -0.243 + (Ht-Z * 0.268) | 0.161 | 0.071 | 0.360 | 0.376 | 0.413 | 0.452 | 0.471 | -0.243 + (Ht-Z * 0.268) |
| <b>6</b>  | 1.069 | 0.076 | 0.366 | 0.386 | 0.428 | 0.469 | 0.489 | -0.127 + (Ht-Z * 0.256) | 0.161 | 0.073 | 0.377 | 0.395 | 0.433 | 0.475 | 0.496 | -0.127 + (Ht-Z * 0.256) |
| <b>7</b>  | 1.069 | 0.077 | 0.383 | 0.403 | 0.448 | 0.492 | 0.512 | -0.145 + (Ht-Z * 0.303) | 0.161 | 0.074 | 0.394 | 0.412 | 0.453 | 0.498 | 0.520 | -0.145 + (Ht-Z * 0.303) |
| <b>8</b>  | 1.069 | 0.078 | 0.398 | 0.420 | 0.467 | 0.514 | 0.535 | -0.044 + (Ht-Z * 0.424) | 0.161 | 0.075 | 0.409 | 0.429 | 0.472 | 0.519 | 0.542 | -0.044 + (Ht-Z * 0.424) |
| <b>9</b>  | 1.069 | 0.079 | 0.414 | 0.437 | 0.487 | 0.536 | 0.559 | 0.040 + (Ht-Z * 0.424)  | 0.161 | 0.076 | 0.424 | 0.444 | 0.490 | 0.539 | 0.564 | 0.040 + (Ht-Z * 0.424)  |
| <b>10</b> | 1.069 | 0.080 | 0.432 | 0.457 | 0.509 | 0.561 | 0.585 | 0.063 + (Ht-Z * 0.424)  | 0.161 | 0.077 | 0.438 | 0.459 | 0.507 | 0.559 | 0.585 | 0.063 + (Ht-Z * 0.424)  |
| <b>11</b> | 1.069 | 0.081 | 0.455 | 0.481 | 0.537 | 0.592 | 0.618 | -0.017 + (Ht-Z * 0.429) | 0.161 | 0.078 | 0.453 | 0.476 | 0.526 | 0.581 | 0.608 | -0.017 + (Ht-Z * 0.429) |
| <b>12</b> | 1.069 | 0.080 | 0.484 | 0.511 | 0.570 | 0.628 | 0.656 | -0.074 + (Ht-Z * 0.433) | 0.161 | 0.079 | 0.472 | 0.496 | 0.549 | 0.607 | 0.636 | -0.074 + (Ht-Z * 0.433) |
| <b>13</b> | 1.069 | 0.078 | 0.515 | 0.544 | 0.604 | 0.665 | 0.693 | -0.121 + (Ht-Z * 0.465) | 0.161 | 0.080 | 0.497 | 0.522 | 0.579 | 0.641 | 0.672 | -0.121 + (Ht-Z * 0.465) |
| <b>14</b> | 1.069 | 0.075 | 0.542 | 0.571 | 0.632 | 0.693 | 0.721 | -0.053 + (Ht-Z * 0.459) | 0.161 | 0.081 | 0.528 | 0.555 | 0.616 | 0.683 | 0.716 | -0.053 + (Ht-Z * 0.459) |
| <b>15</b> | 1.069 | 0.072 | 0.563 | 0.592 | 0.653 | 0.713 | 0.741 | -0.022 + (Ht-Z * 0.405) | 0.161 | 0.080 | 0.565 | 0.593 | 0.658 | 0.728 | 0.763 | -0.022 + (Ht-Z * 0.405) |
| <b>16</b> | 1.069 | 0.070 | 0.579 | 0.607 | 0.667 | 0.727 | 0.755 | 0.029 + (Ht-Z * 0.421)  | 0.161 | 0.078 | 0.600 | 0.629 | 0.696 | 0.768 | 0.804 | 0.029 + (Ht-Z * 0.421)  |
| <b>17</b> | 1.069 | 0.069 | 0.590 | 0.618 | 0.678 | 0.737 | 0.765 | 0.069 + (Ht-Z * 0.341)  | 0.161 | 0.076 | 0.628 | 0.658 | 0.726 | 0.799 | 0.835 | 0.069 + (Ht-Z * 0.341)  |
| <b>18</b> | 1.069 | 0.068 | 0.597 | 0.625 | 0.685 | 0.744 | 0.771 | 0.001 + (Ht-Z * 0.407)  | 0.161 | 0.074 | 0.650 | 0.680 | 0.748 | 0.821 | 0.858 | 0.001 + (Ht-Z * 0.407)  |
| <b>19</b> | 1.069 | 0.067 | 0.603 | 0.631 | 0.690 | 0.749 | 0.776 | -0.003 + (Ht-Z * 0.450) | 0.161 | 0.072 | 0.667 | 0.697 | 0.765 | 0.839 | 0.875 | -0.003 + (Ht-Z * 0.450) |
| <b>20</b> | 1.069 | 0.066 | 0.607 | 0.635 | 0.694 | 0.752 | 0.780 | -0.036 + (Ht-Z * 0.443) | 0.161 | 0.071 | 0.682 | 0.712 | 0.781 | 0.854 | 0.890 | -0.036 + (Ht-Z * 0.443) |

# Lumbar Spine Bone Mineral Content

Figure 1.

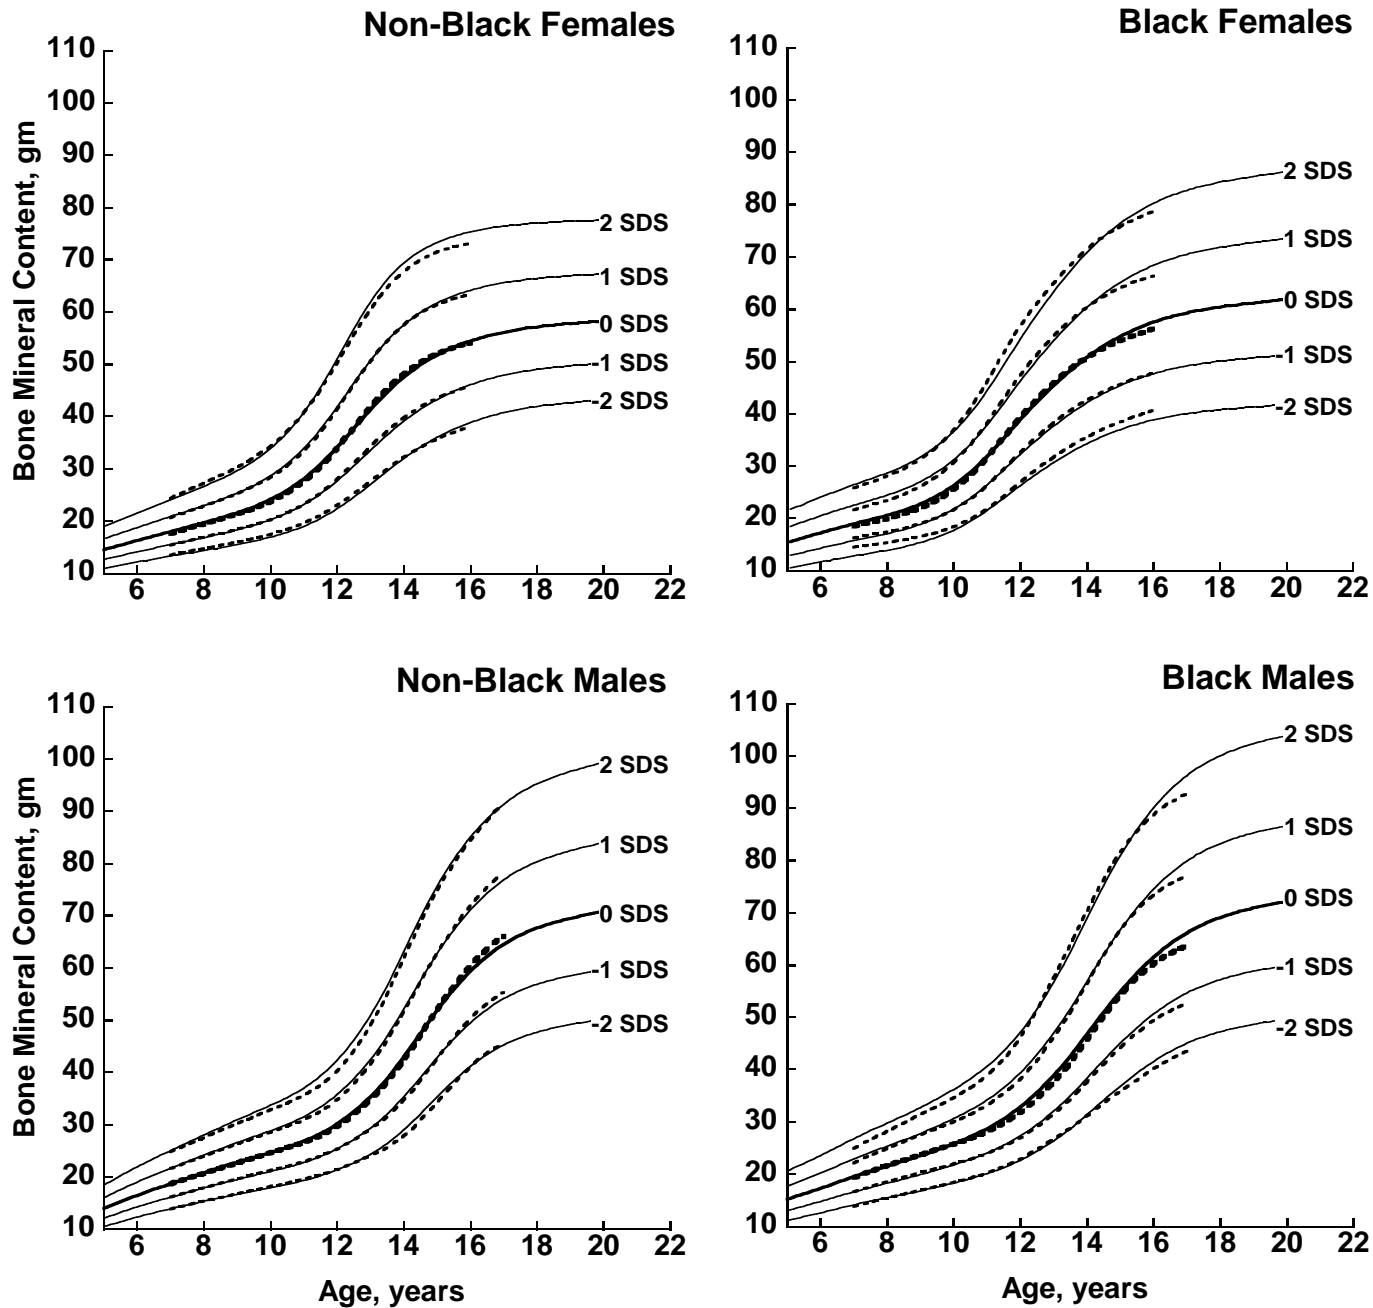

# Lumbar Spine areal Bone Mineral Density

Figure 2.

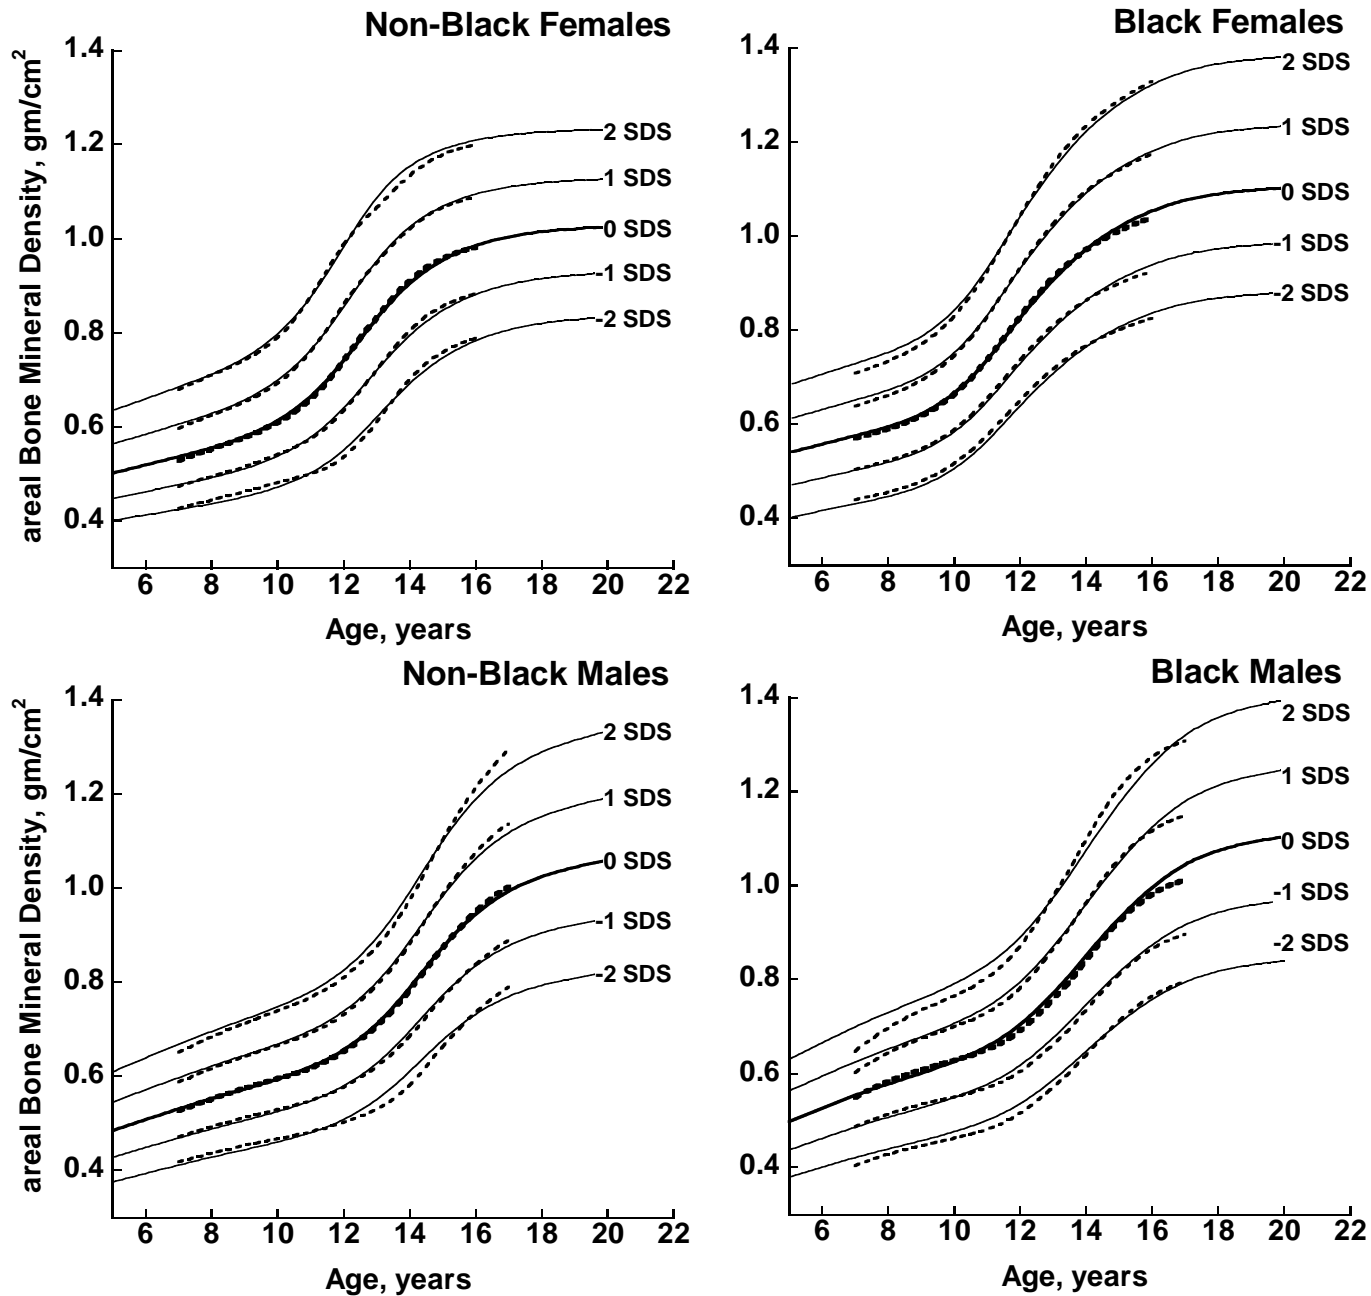

# Total Body Bone Mineral Content

Figure 3.

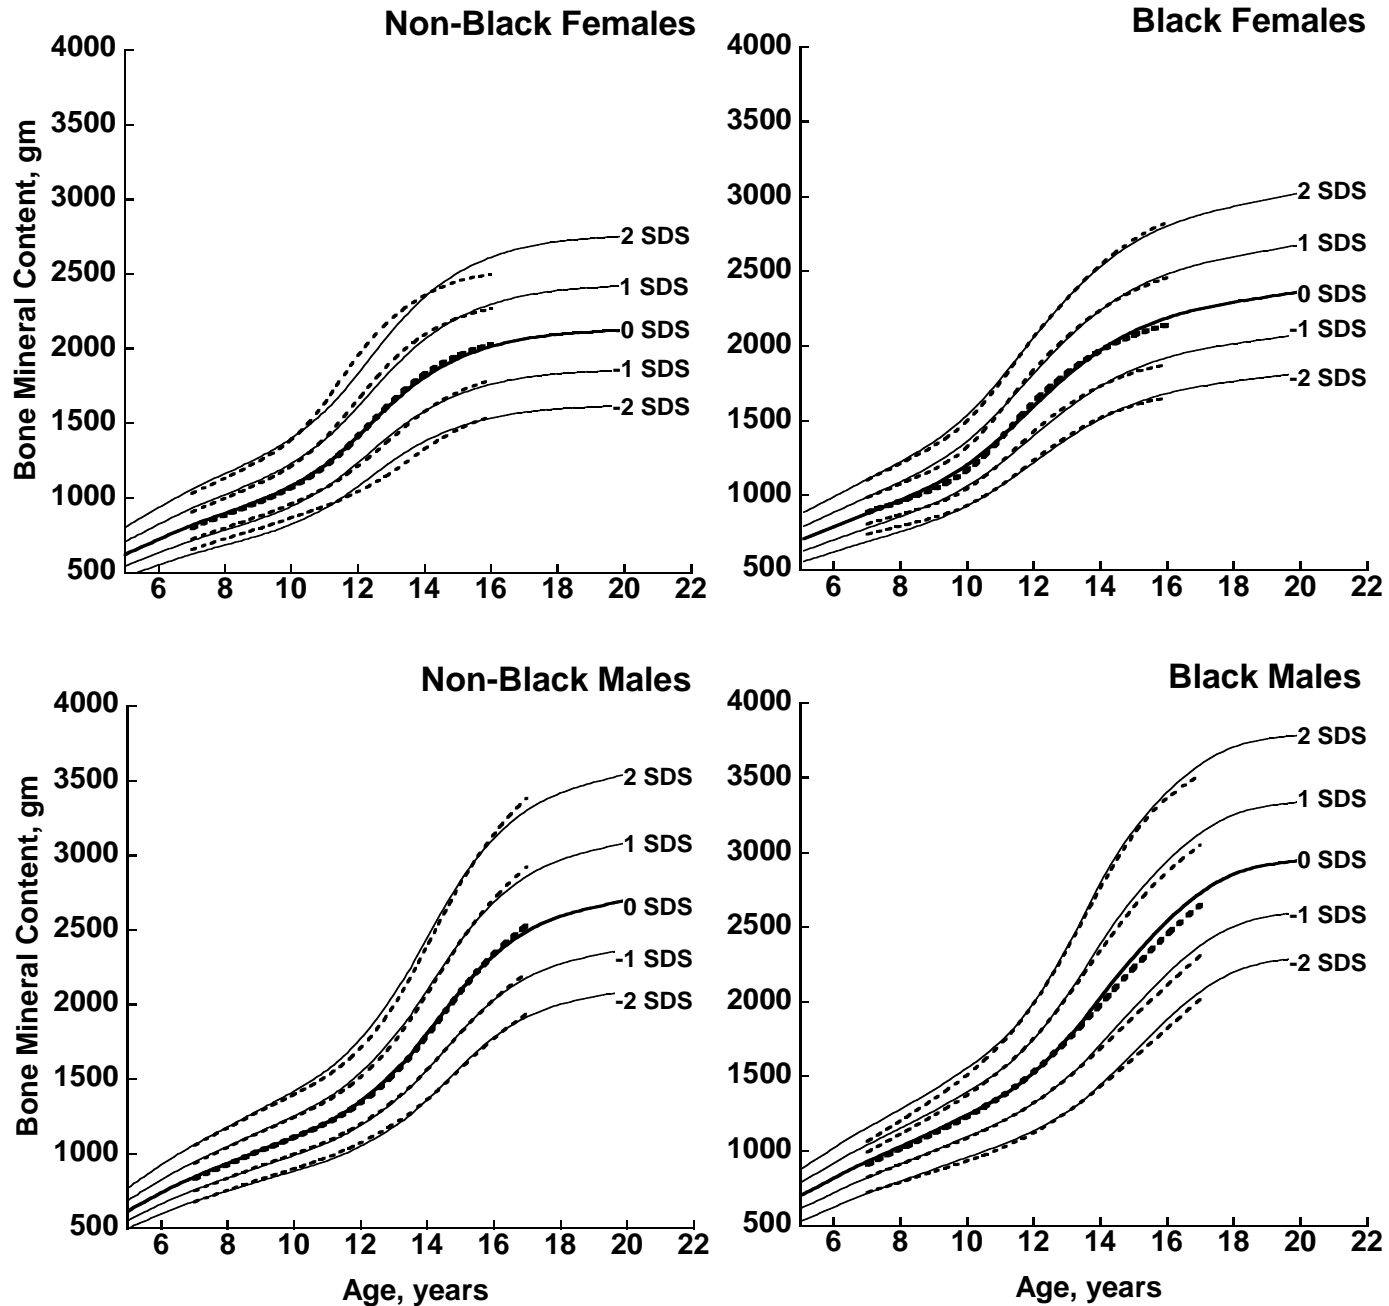



# Total Body areal Bone Mineral Density

Figure 4.

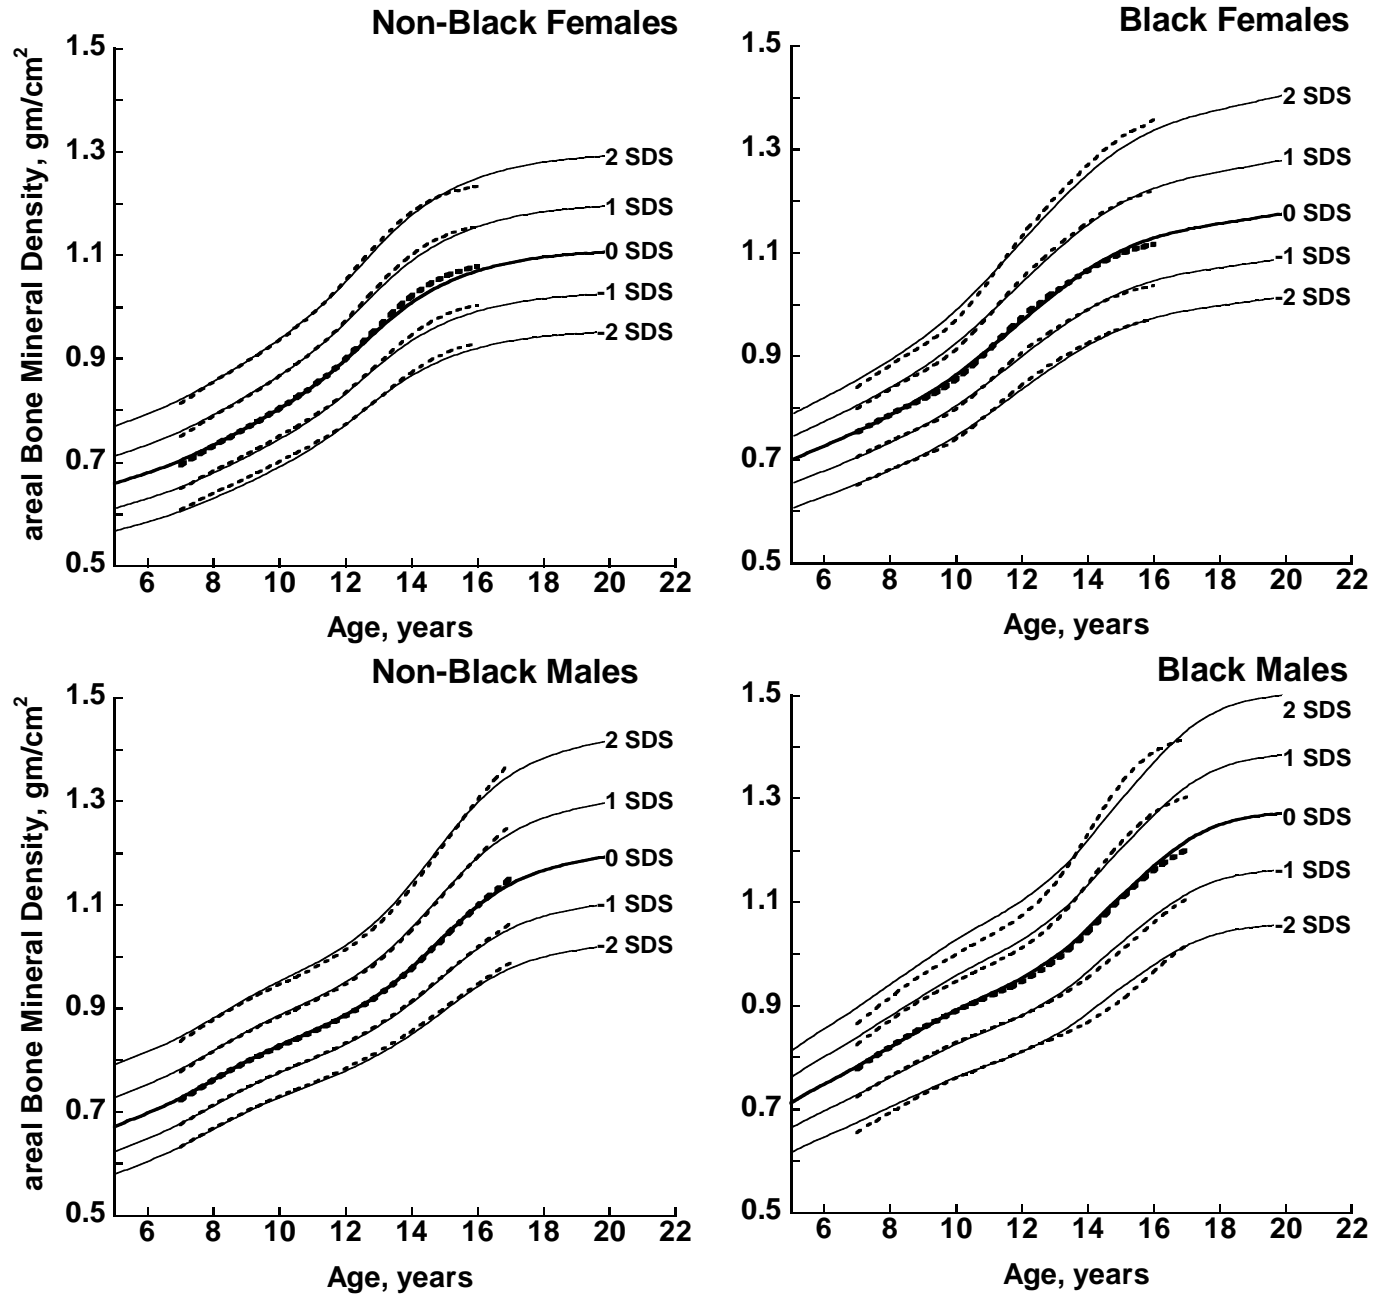

Figure 5.

# Distal One Third Radius areal Bone Mineral Density

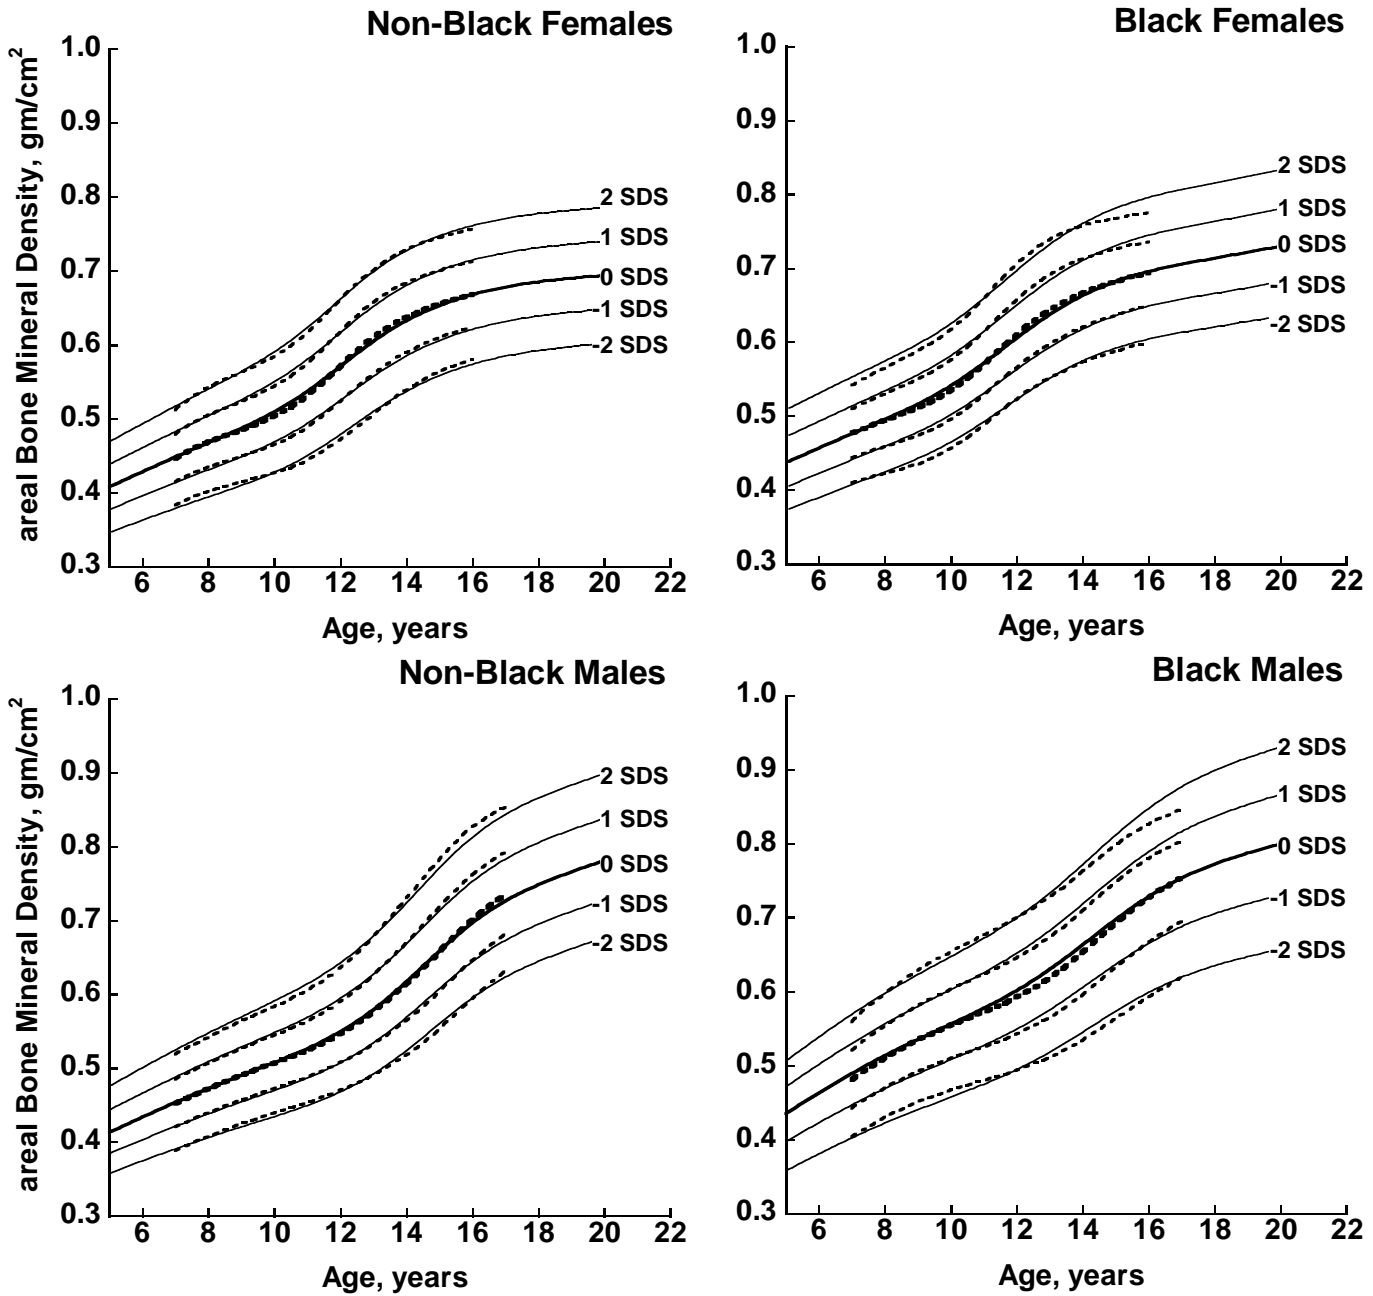

Supplement: supp_jc.2011-1111_11-1111_Supp_Files_ALL.pdf [file supp_jc.2011-1111_11-1111_Supp_Files_ALL.pdf]
